# Supplementary material for: Synthesis and Insecticidal Activity of Fire Ant Venom Alkaloid-Based 2-Methyl-6-alkyl-Δ1,6-piperideines
Source: MDPI journal article supplement (doi:10.3390/molecules27031107), 2022-02-07
Supplement: s1 [file s1]

# **Synthesis and insecticidal activity of Fire Ant Venom Alkaloid**

## **Based 2-Methyl-6-alkyl- $\Delta^{1,6}$ -piperideines**

### **Table of Contents**

- S1.  $^1\text{H}$  NMR Spectrum of Compound **2**
- S2.  $^1\text{H}$  NMR Spectrum of Compound **3**
- S3.  $^1\text{H}$  NMR Spectrum of Compound **4**
- S4.  $^1\text{H}$  NMR Spectrum of Compound **5a**
- S5.  $^{13}\text{C}$  NMR Spectrum of Compound **5a**
- S6.  $^1\text{H}$  NMR Spectrum of Compound **5b**
- S7.  $^{13}\text{C}$  NMR Spectrum of Compound **5b**
- S8.  $^1\text{H}$  NMR Spectrum of Compound **5c**
- S9.  $^{13}\text{C}$  NMR Spectrum of Compound **5c**
- S10.  $^1\text{H}$  NMR Spectrum of Compound **6a**
- S11.  $^{13}\text{C}$  NMR Spectrum of Compound **6a**
- S12. HRMS Spectrum of Compound **6a**
- S13.  $^1\text{H}$  NMR Spectrum of Compound **6b**
- S14.  $^{13}\text{C}$  NMR Spectrum of Compound **6b**
- S15. HRMS Spectrum of Compound **6b**
- S16.  $^1\text{H}$  NMR Spectrum of Compound **6c**
- S17.  $^{13}\text{C}$  NMR Spectrum of Compound **6c**
- S18. HRMS Spectrum of Compound **6c**

# S1. $^1\text{H}$ NMR Spectrum of Compound 2

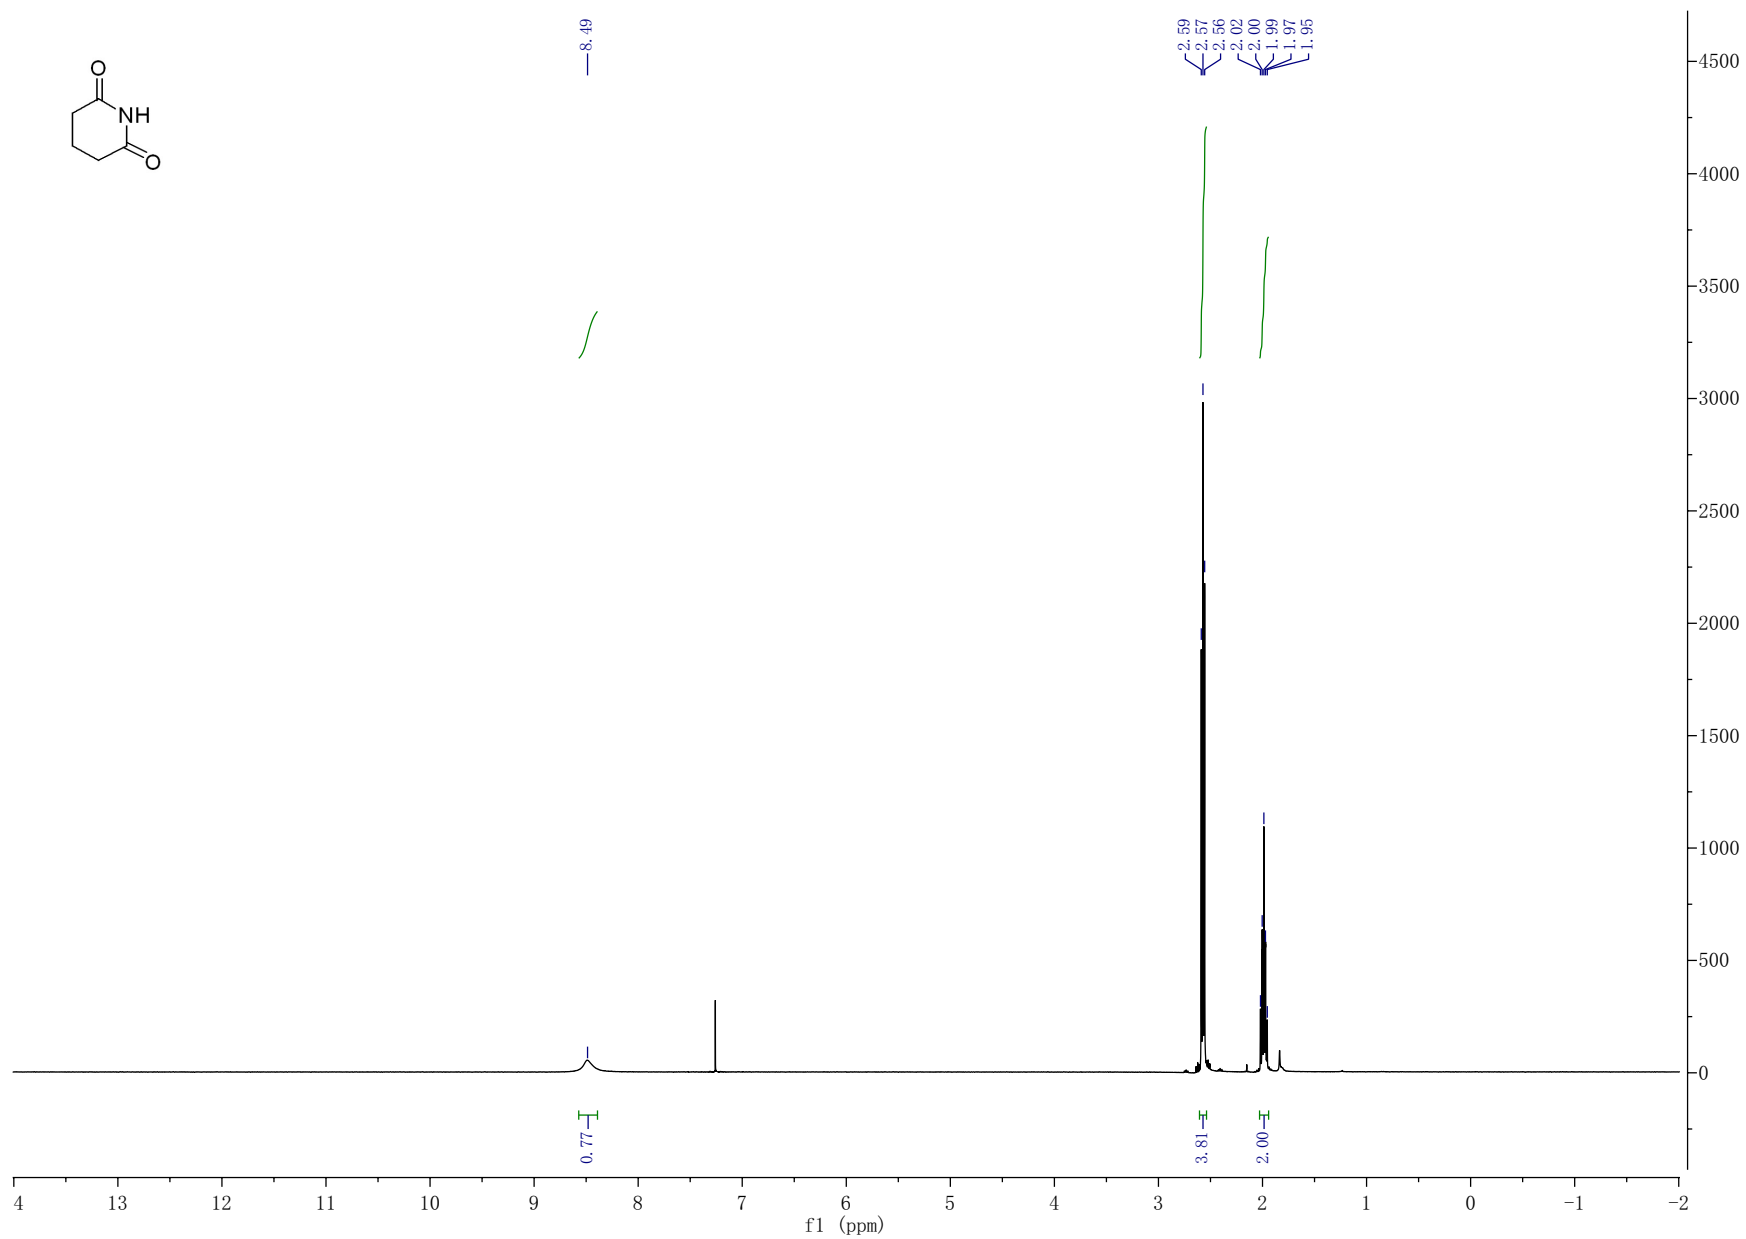

## S2. $^1\text{H}$ NMR Spectrum of Compound 3

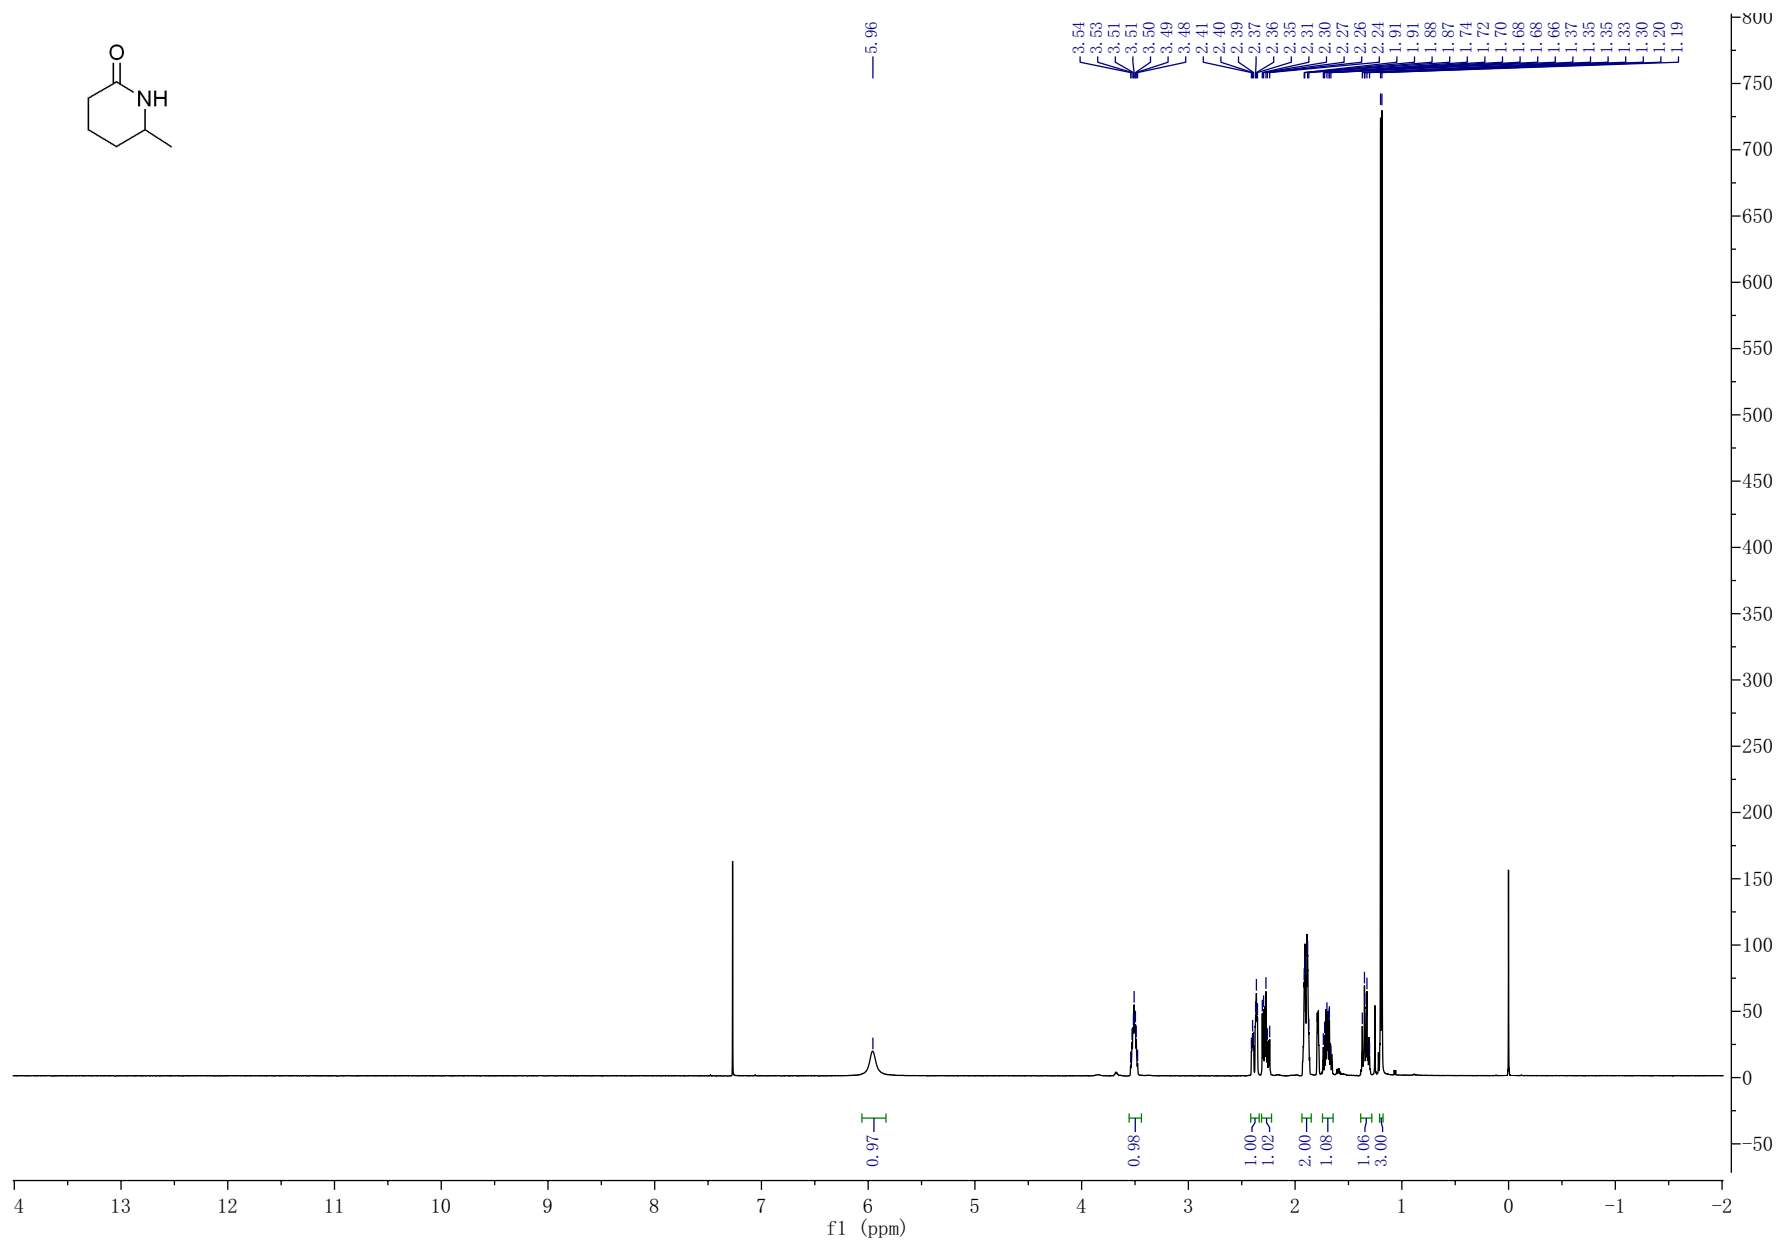

### S3. $^1\text{H}$ NMR Spectrum of Compound 4

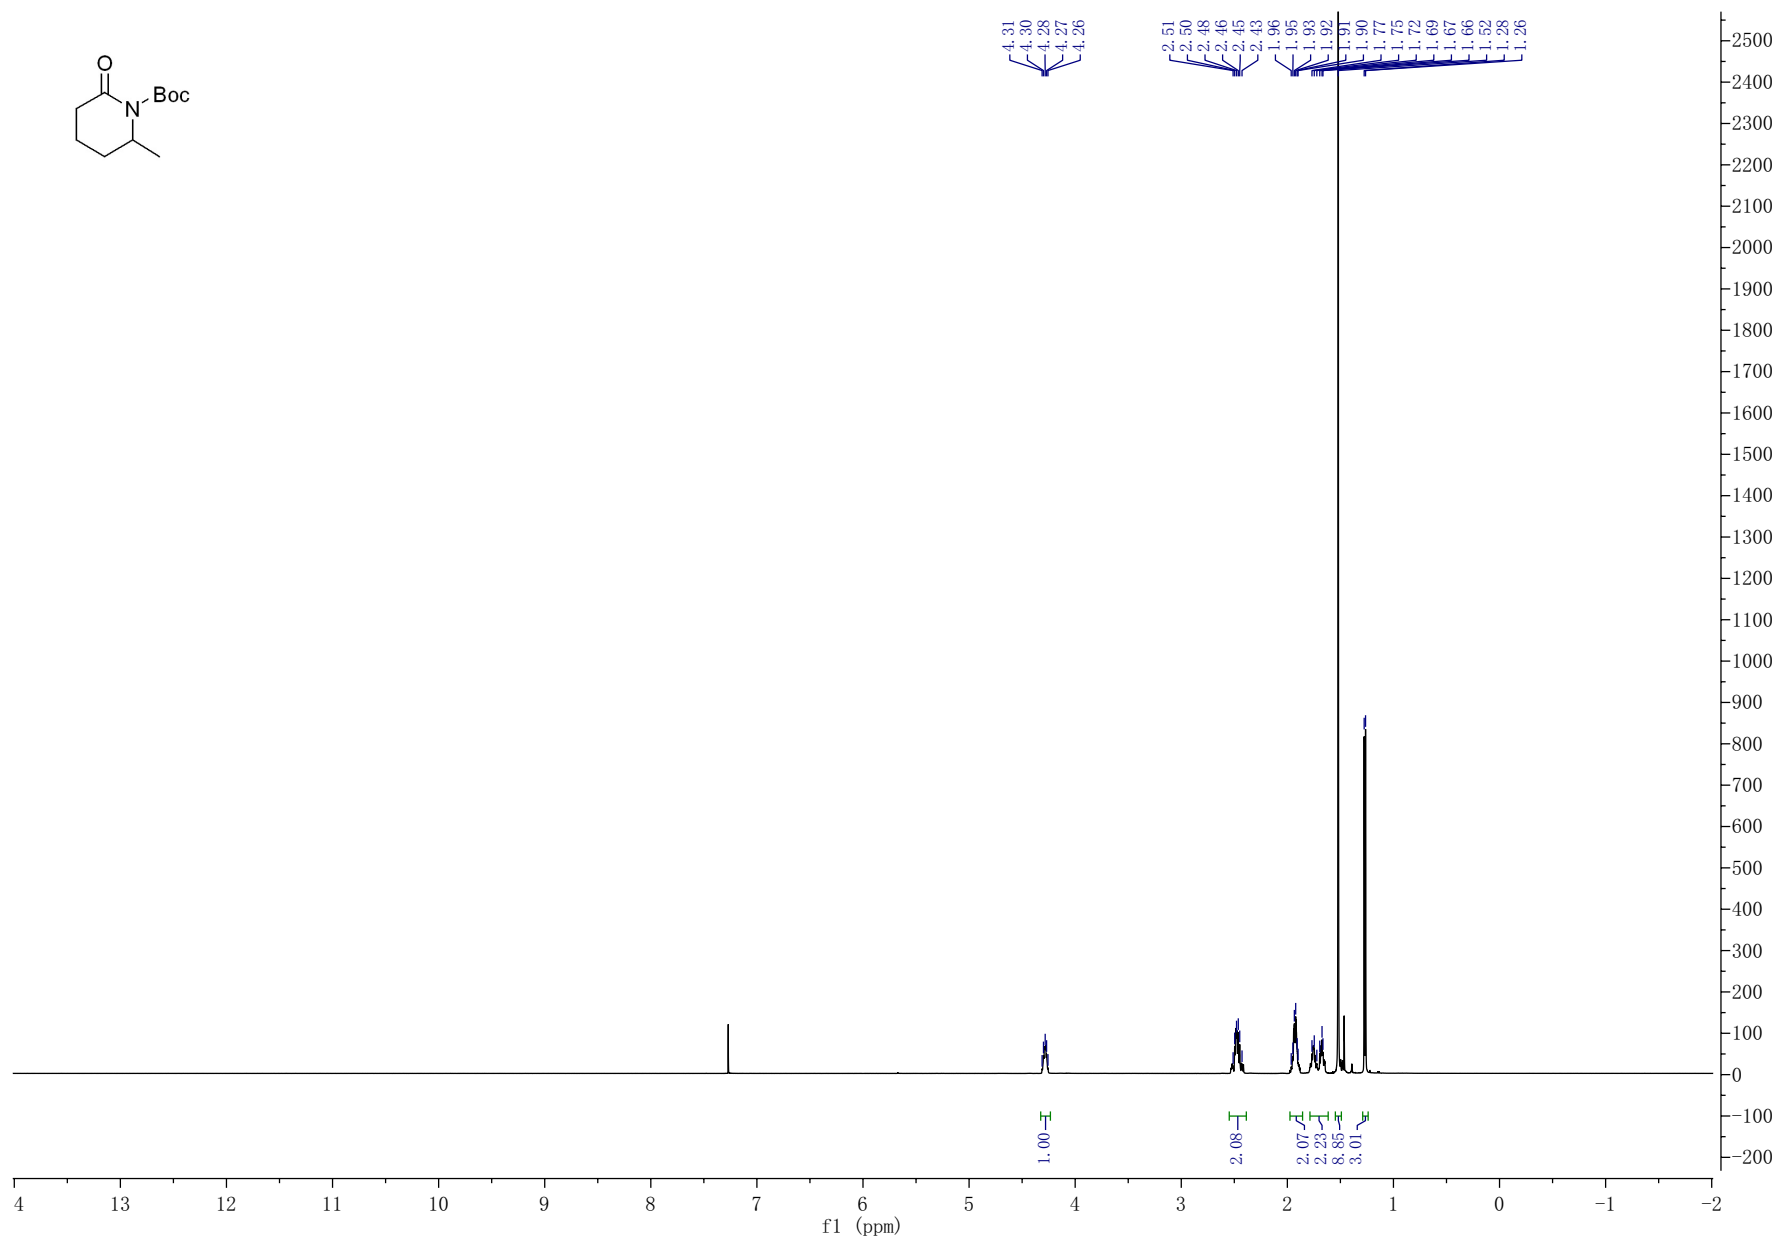

# S4. $^1\text{H}$ NMR Spectrum of Compound 5a

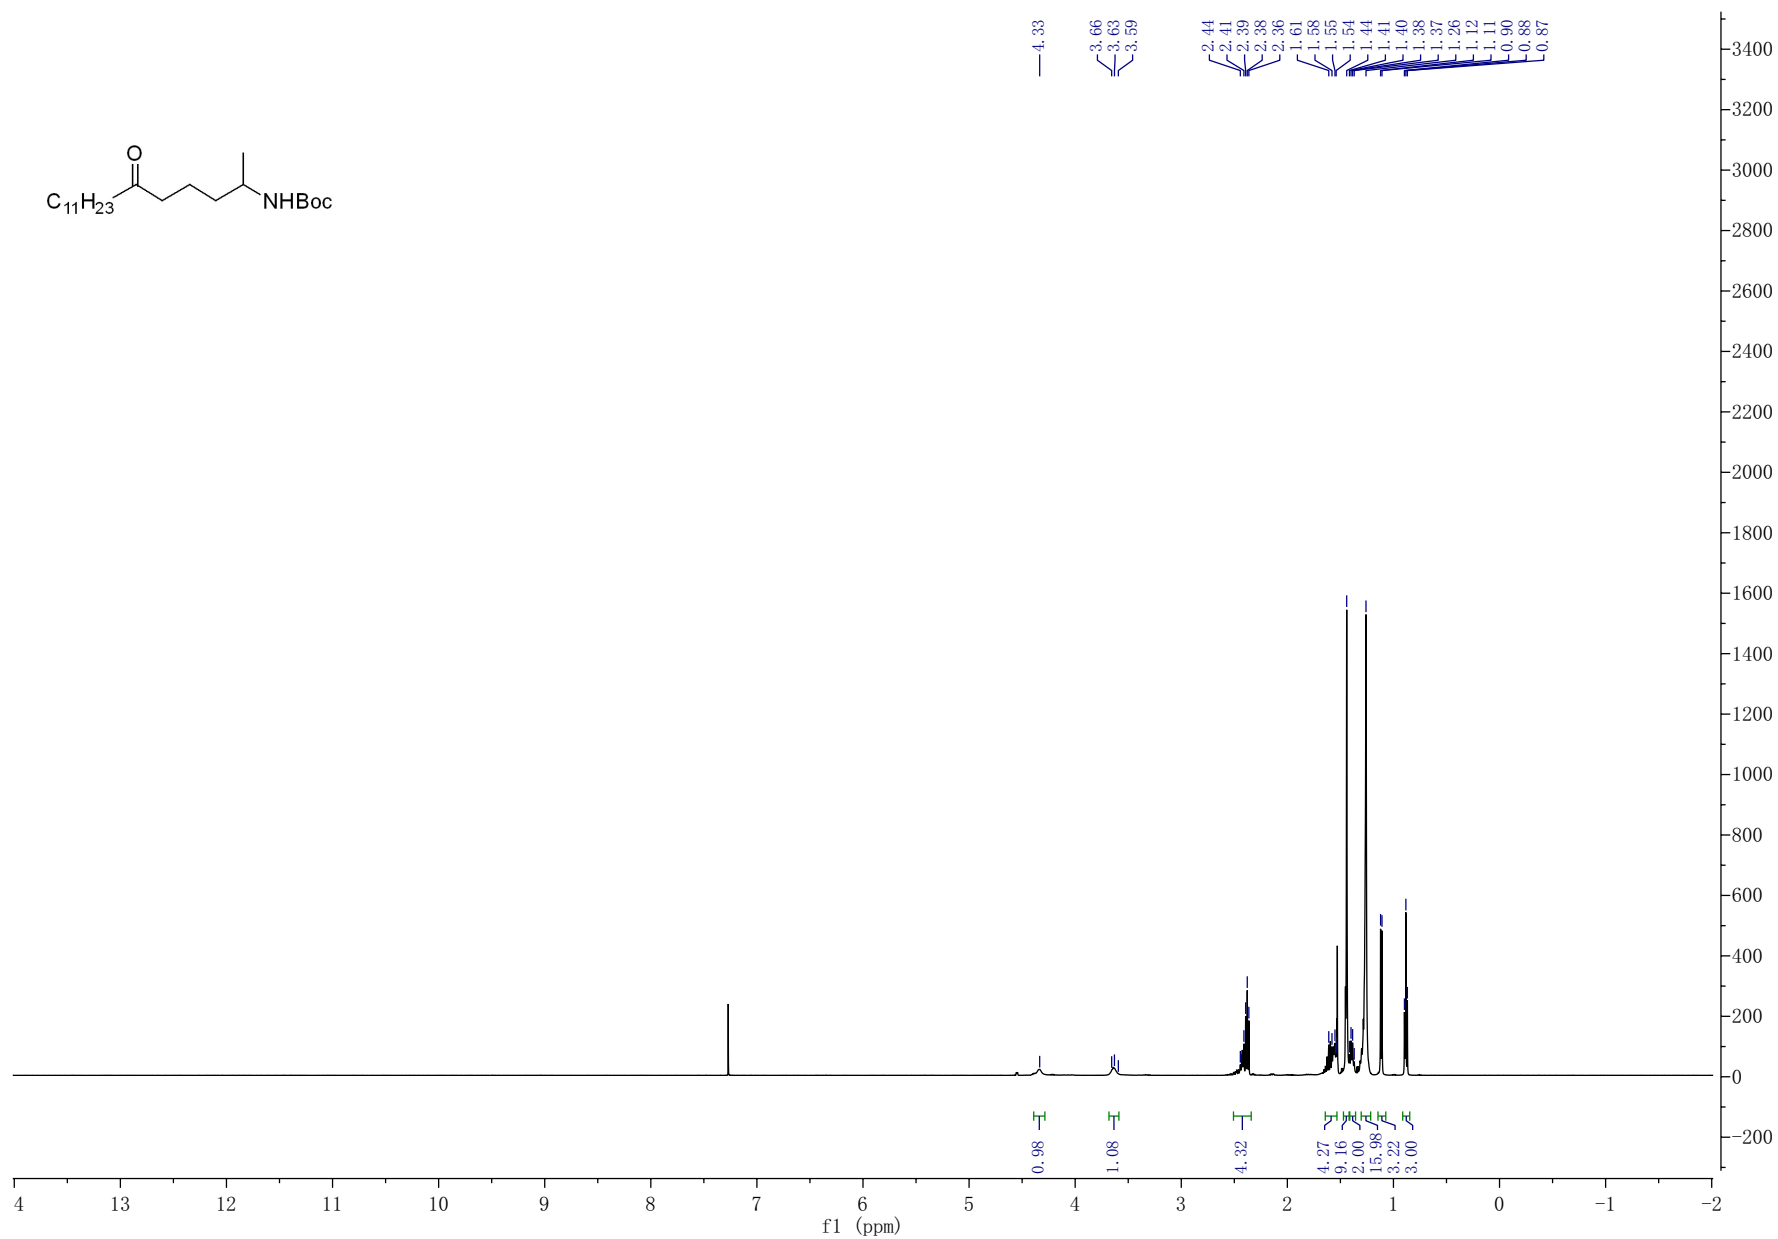

# S5. $^{13}\text{C}$ NMR Spectrum of Compound 5a

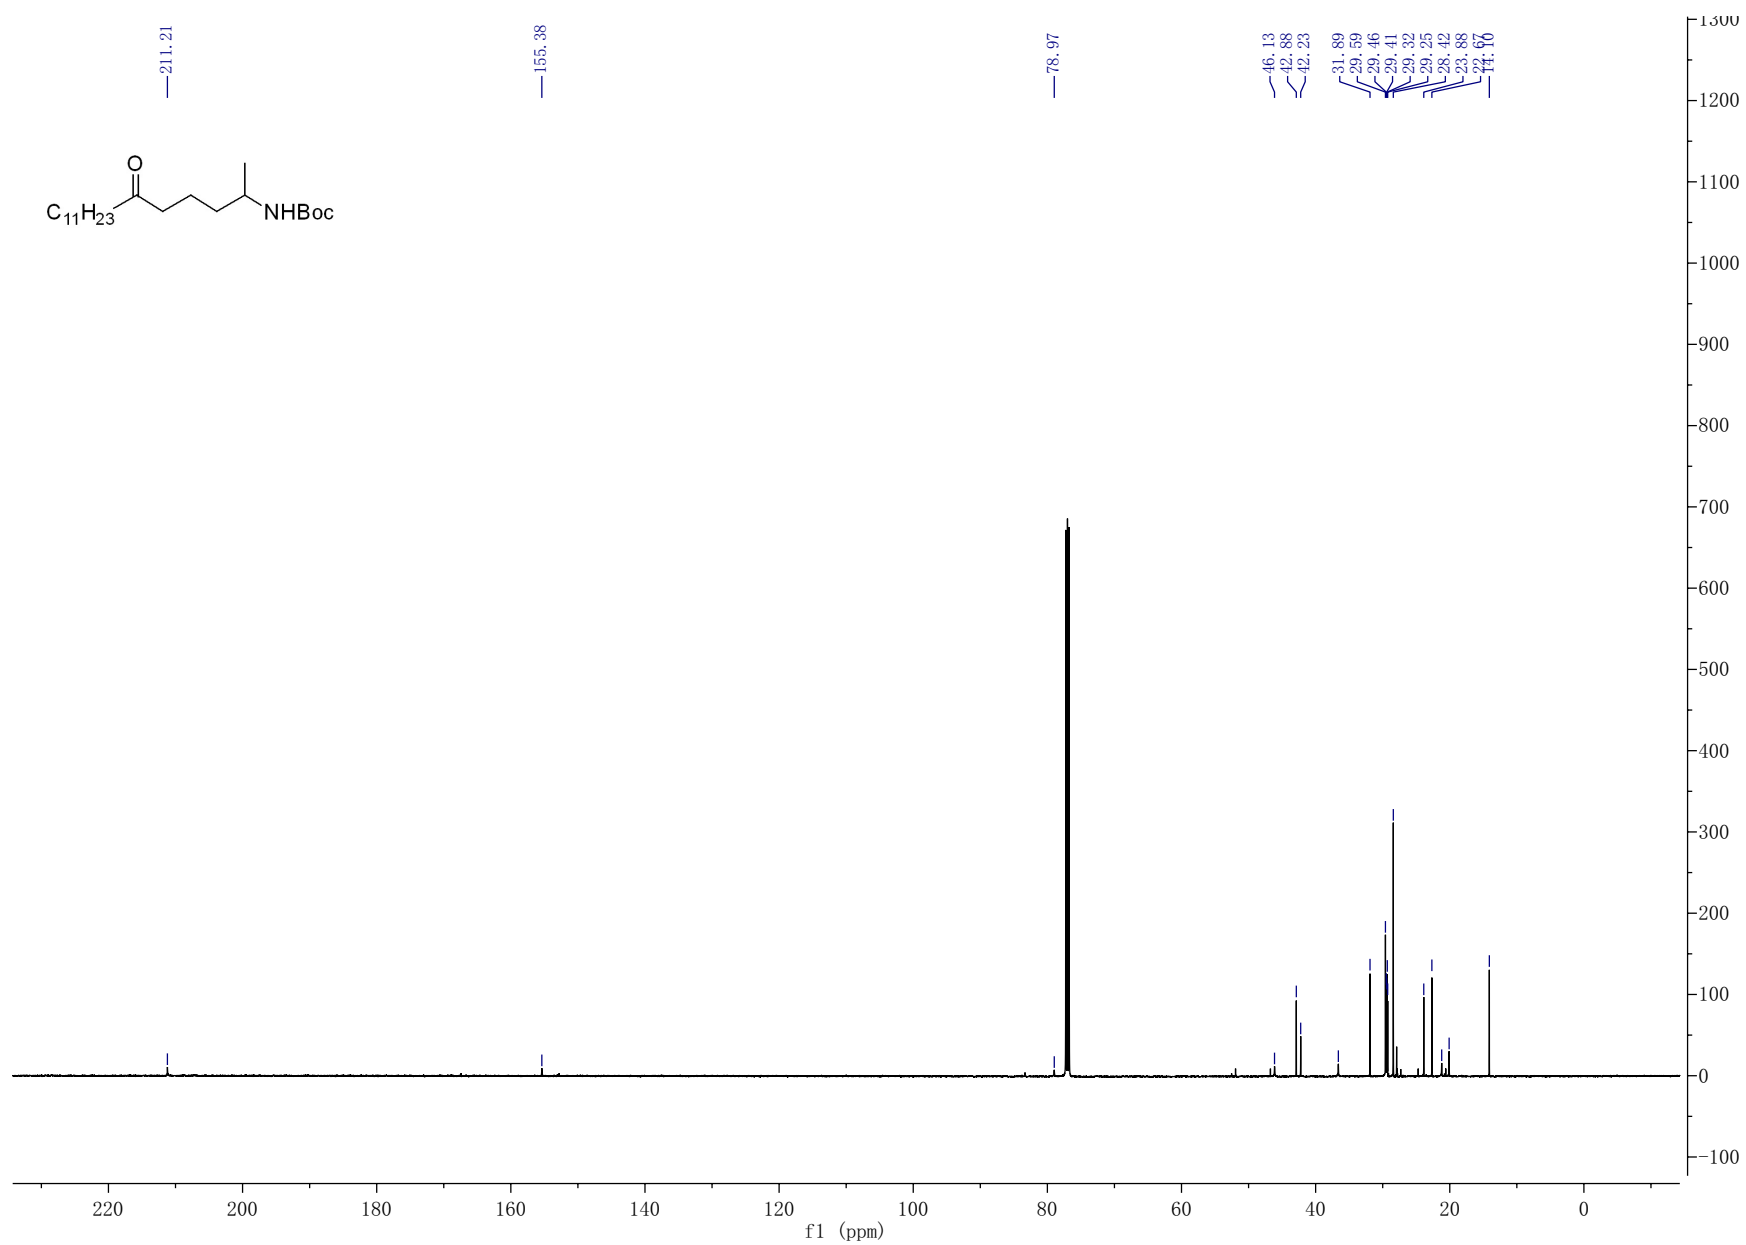

# S6. $^1\text{H}$ NMR Spectrum of Compound 5b

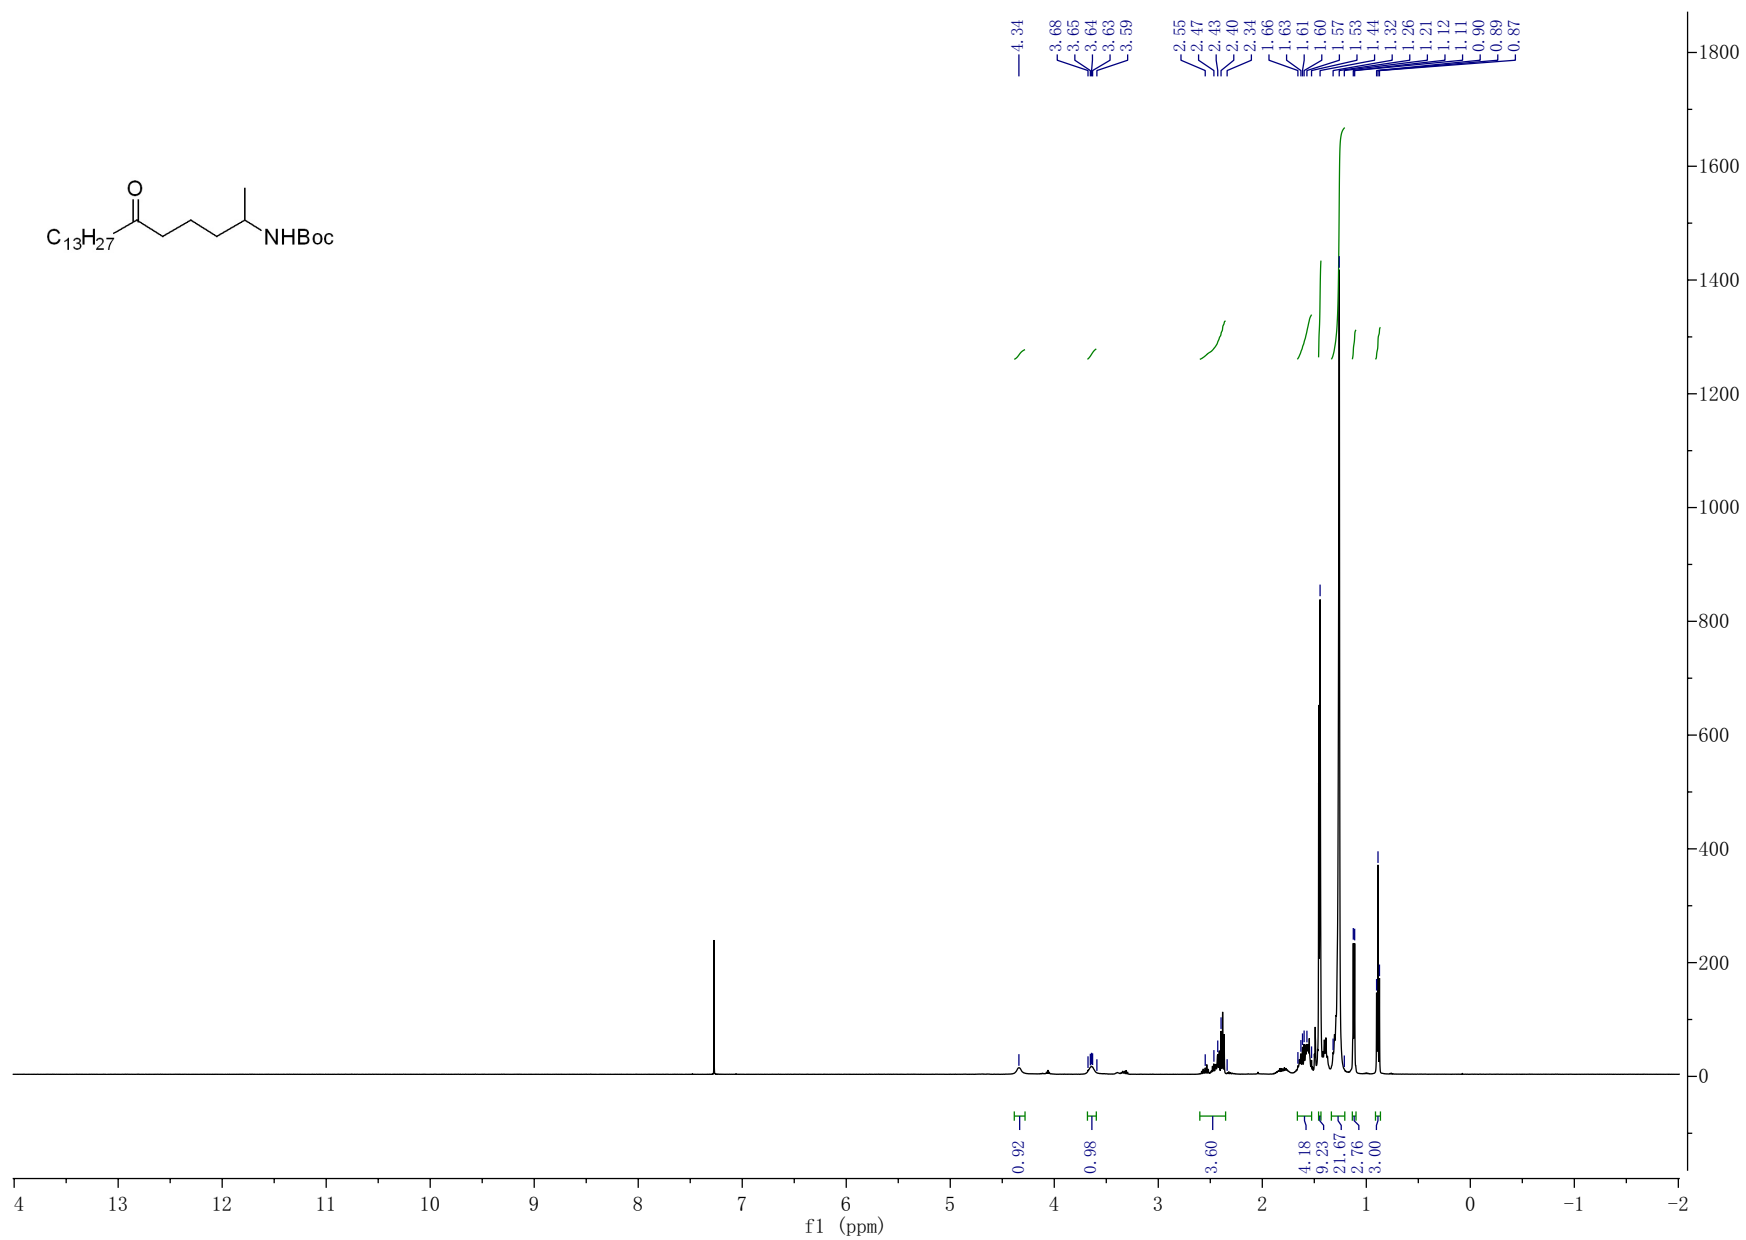

# S7. $^{13}\text{C}$ NMR Spectrum of Compound 5b

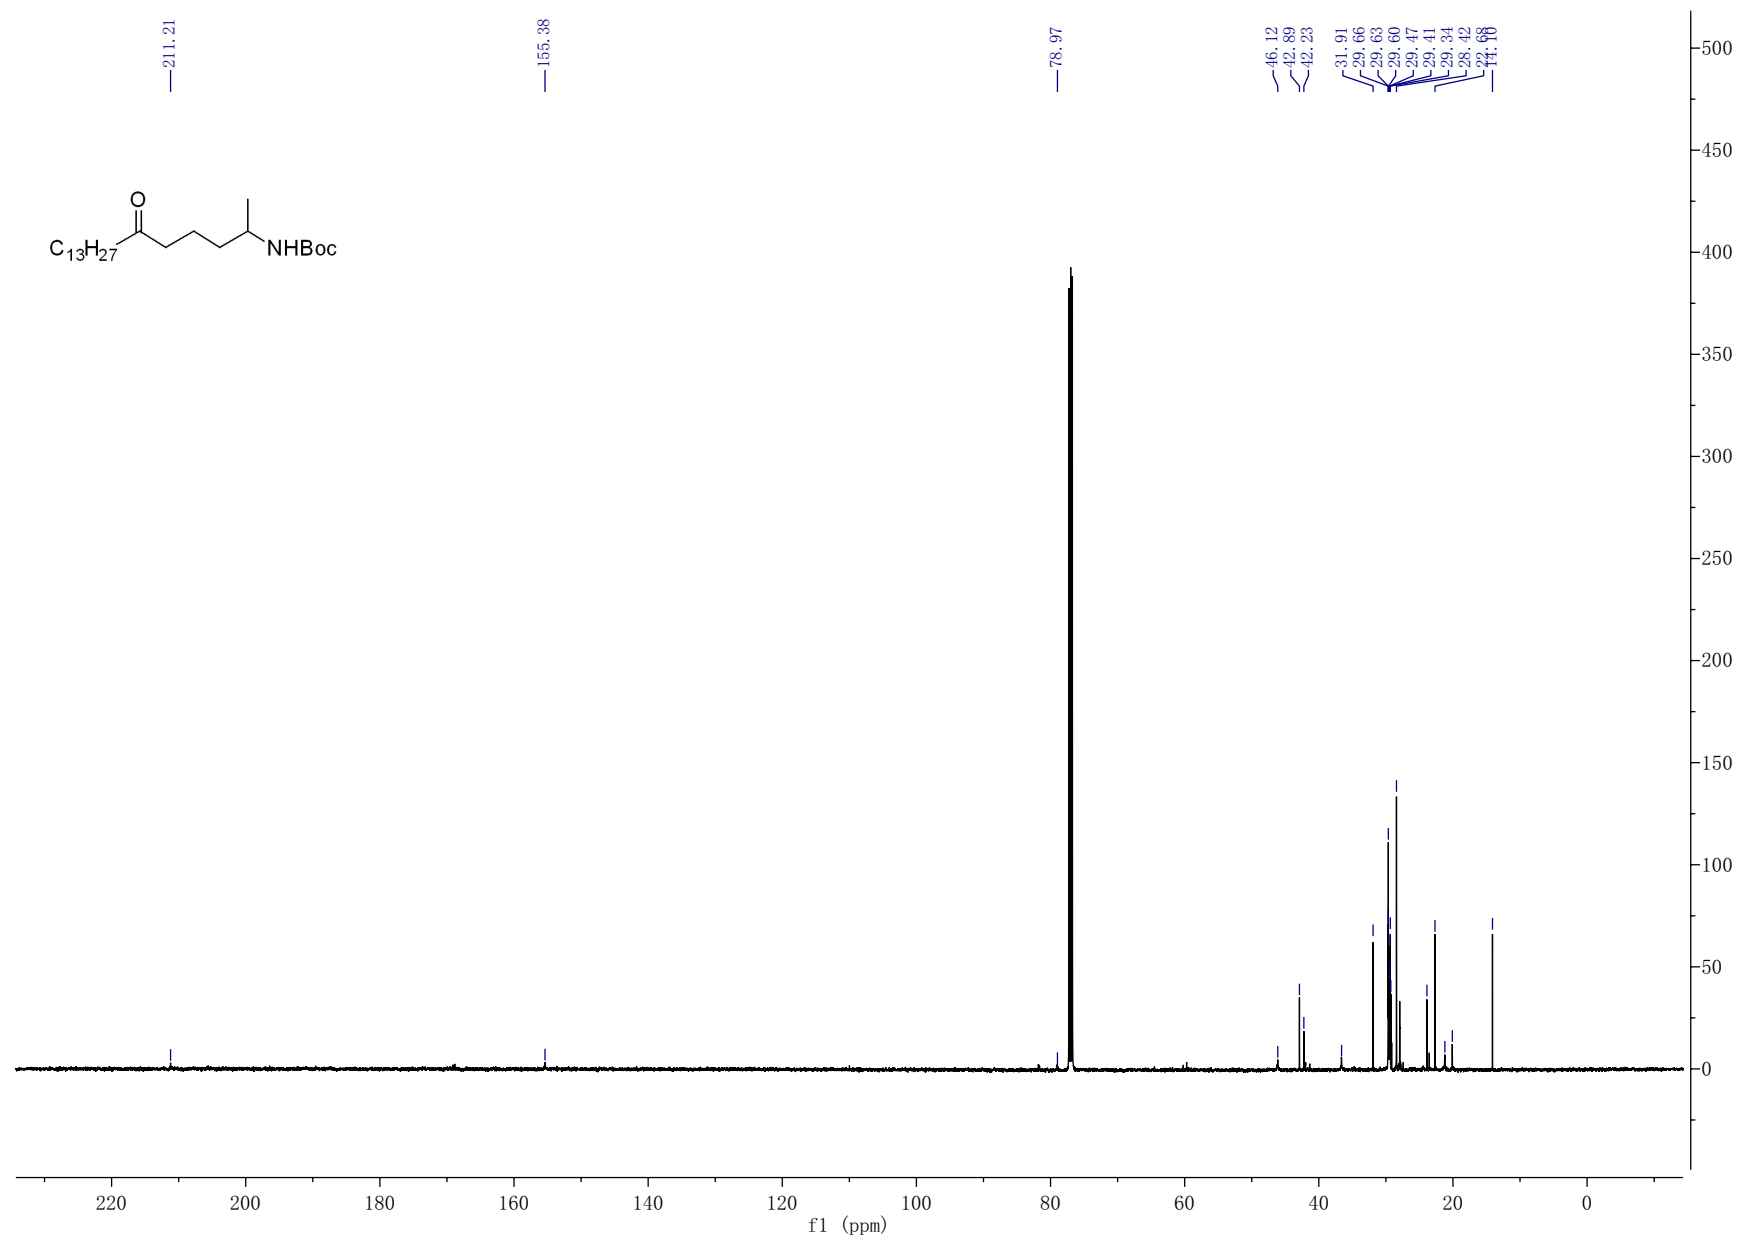



# S8. $^1\text{H}$ NMR Spectrum of Compound 5c

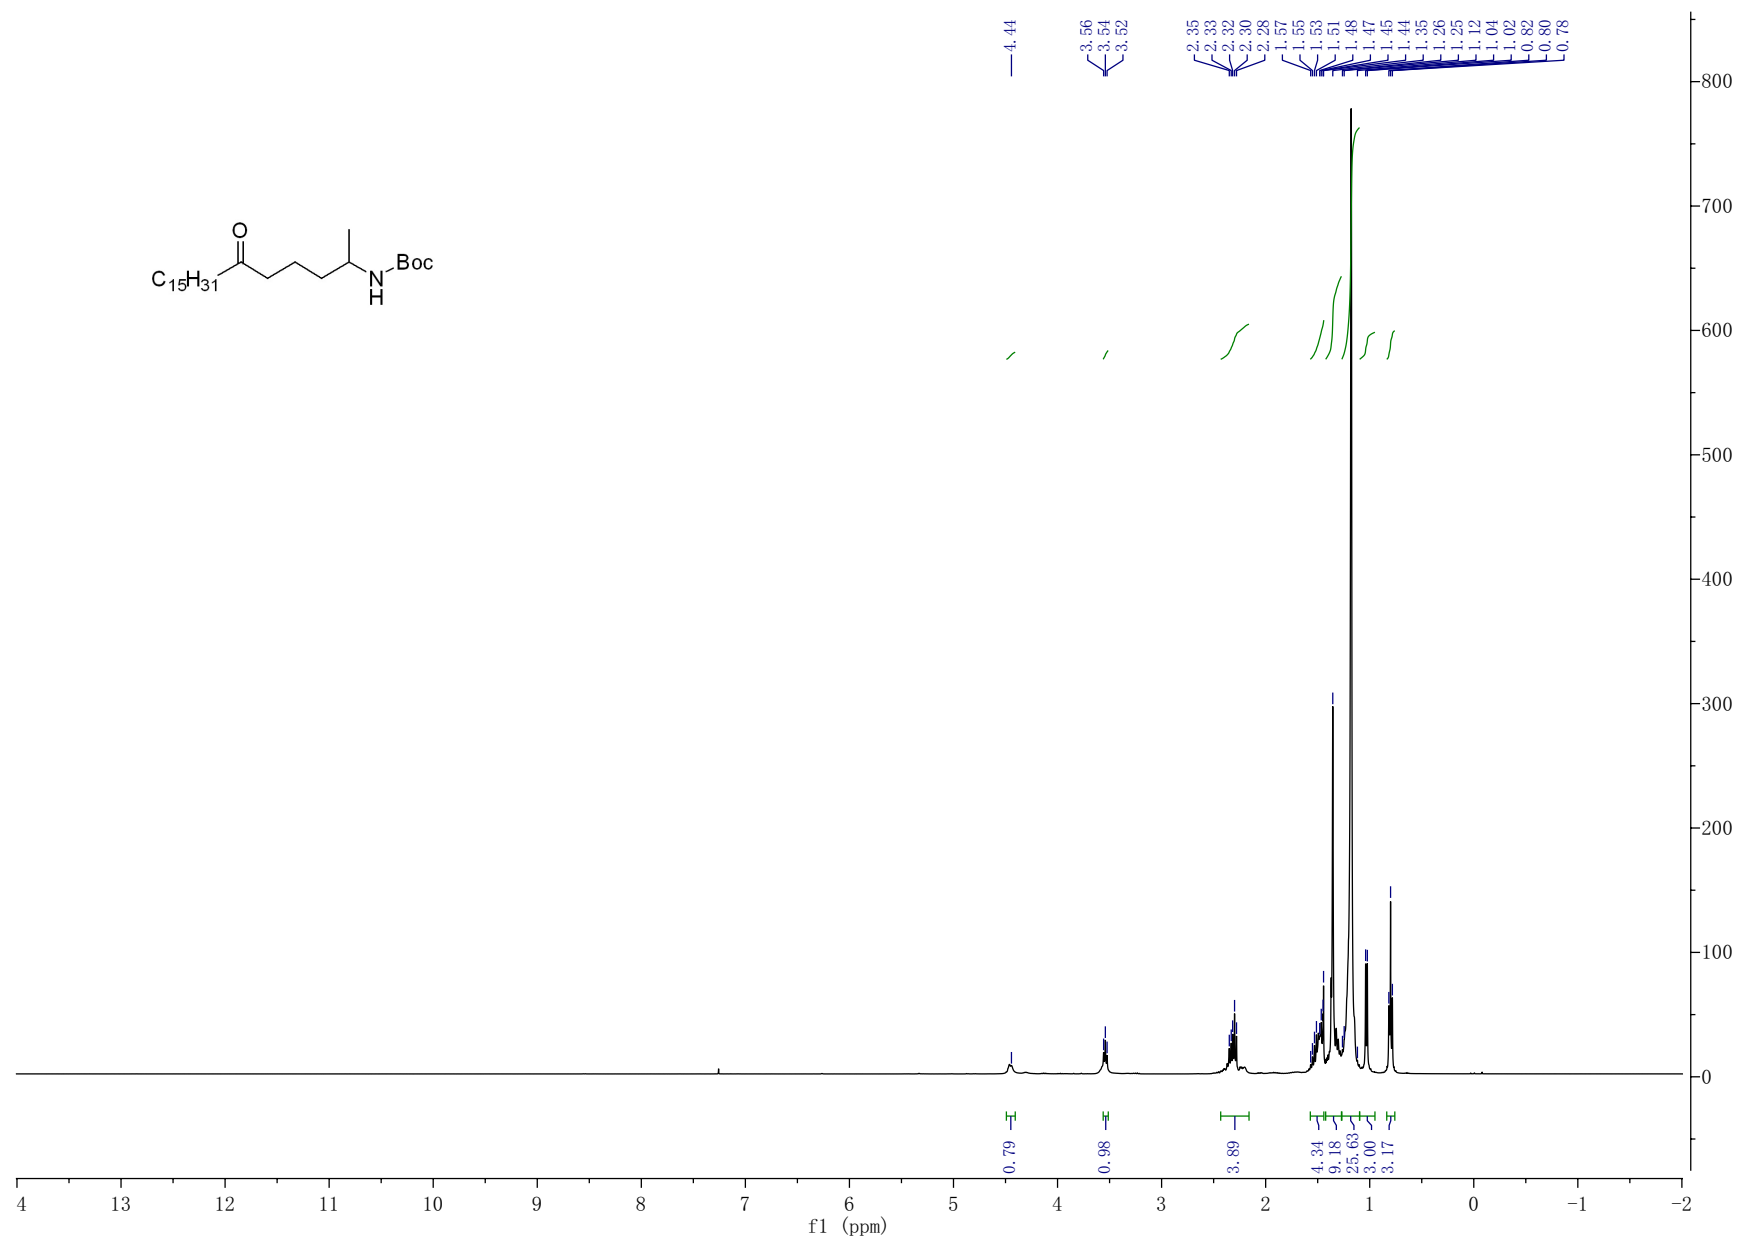

# S9. $^{13}\text{C}$ NMR Spectrum of Compound 5c

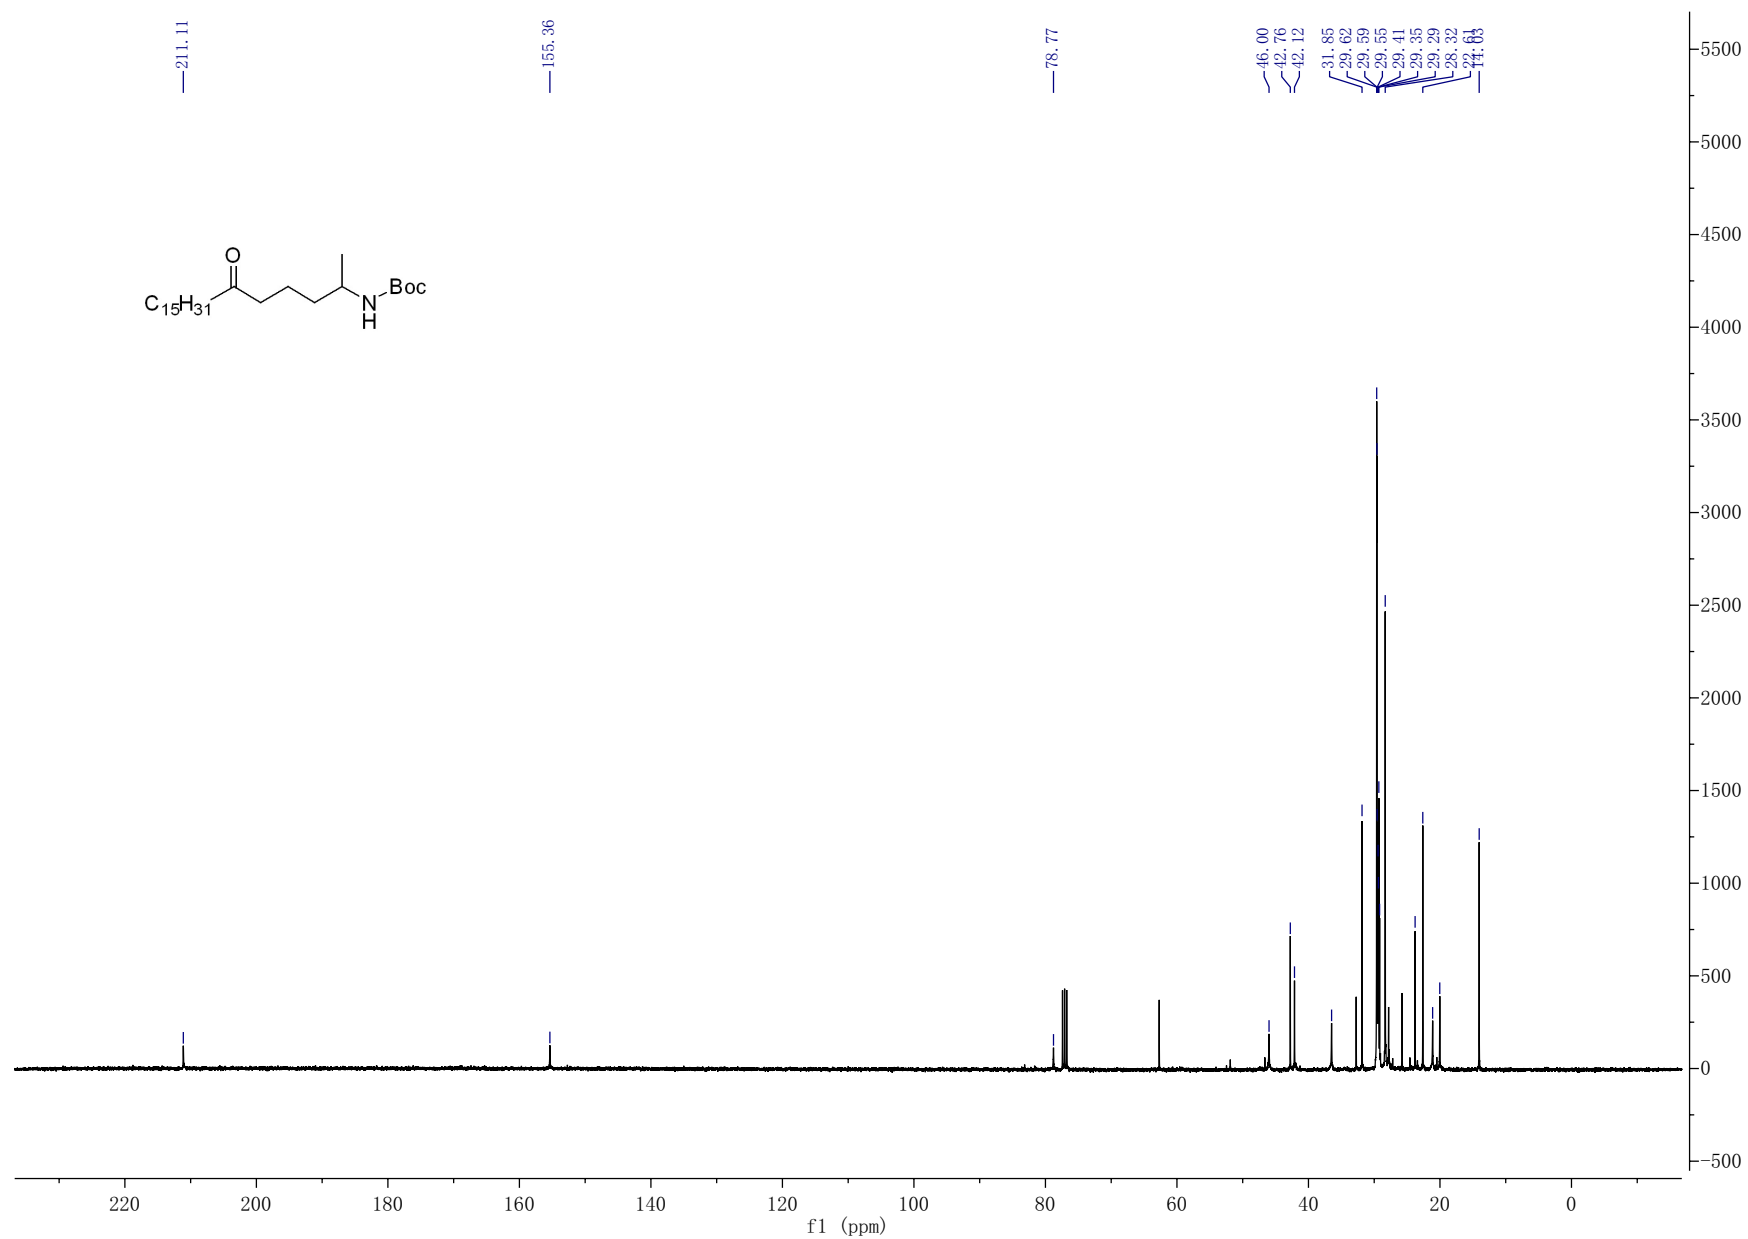

# S10. <sup>1</sup>H NMR Spectrum of Compound 6a

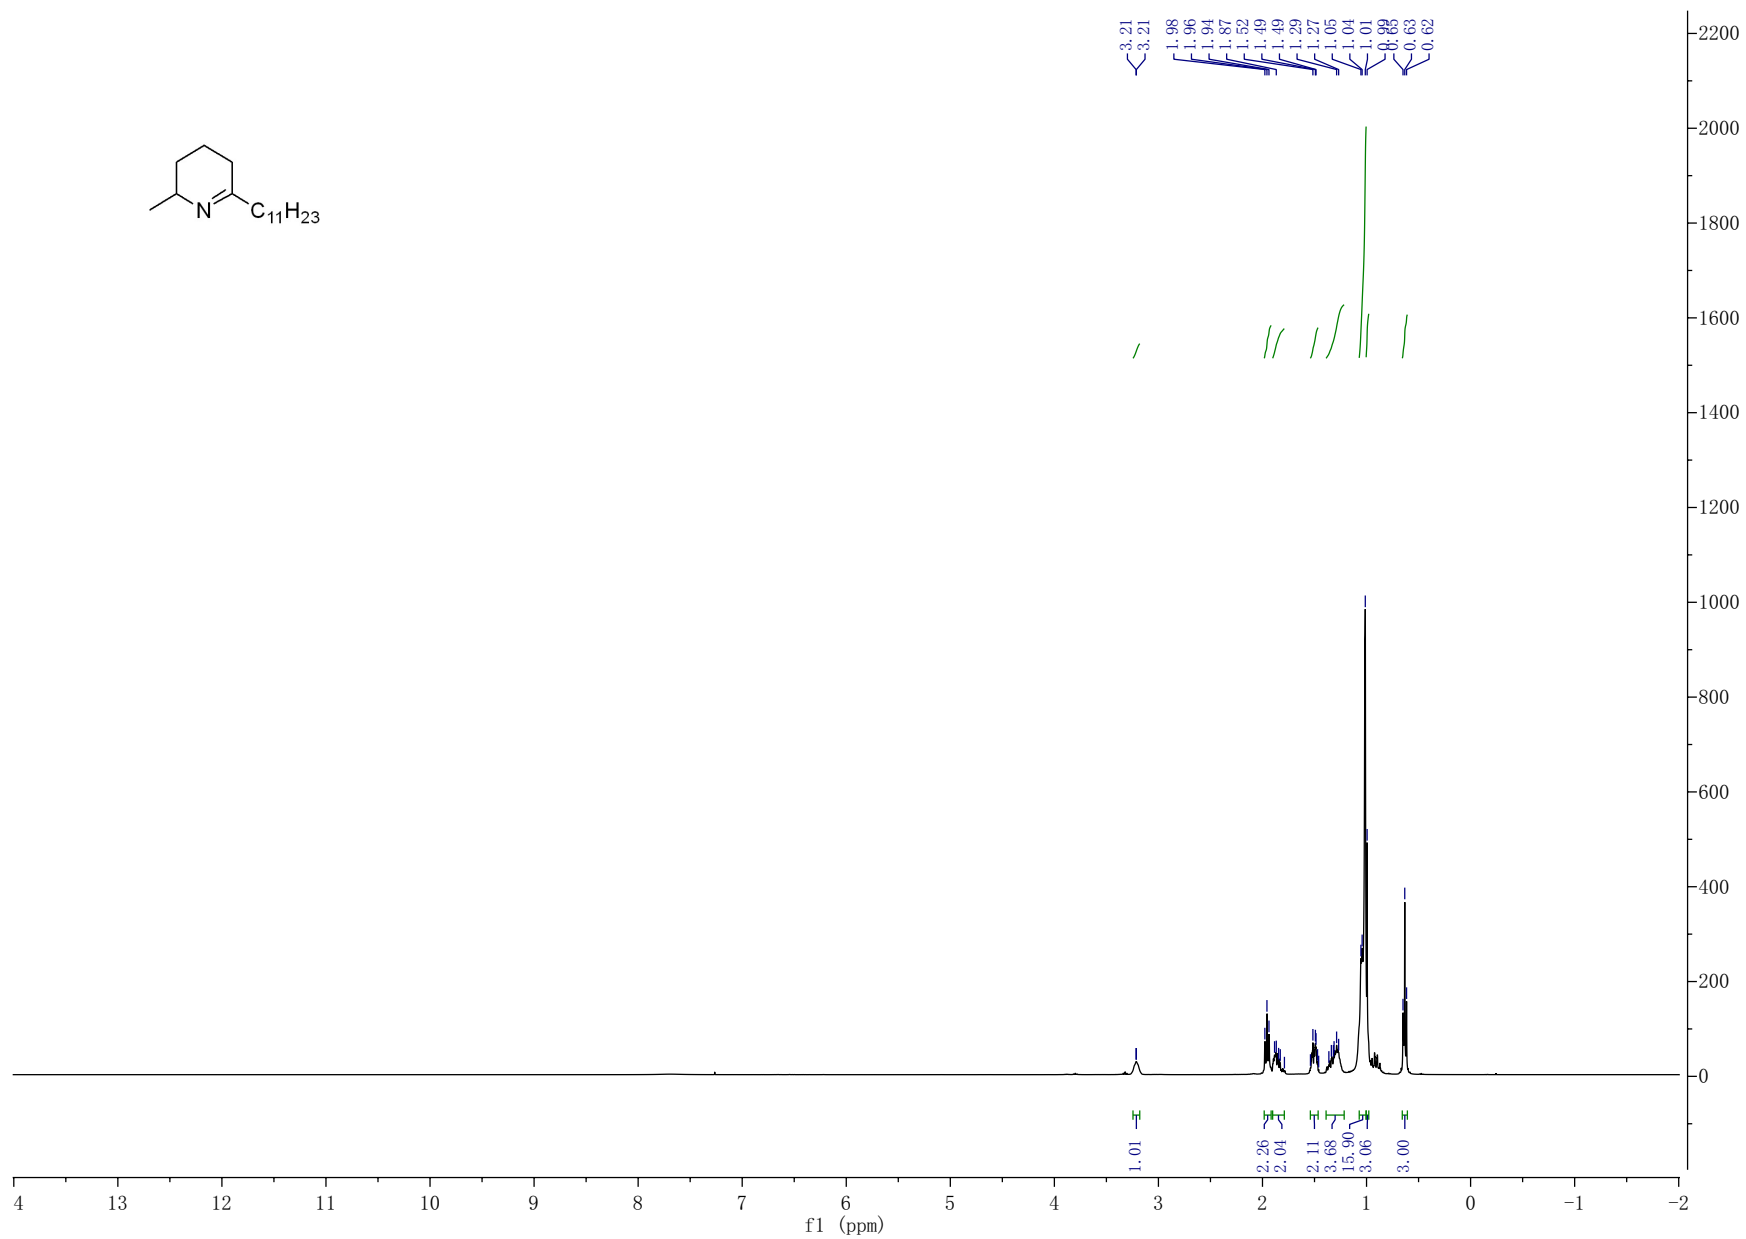

# S11. $^{13}\text{C}$ NMR Spectrum of Compound6a

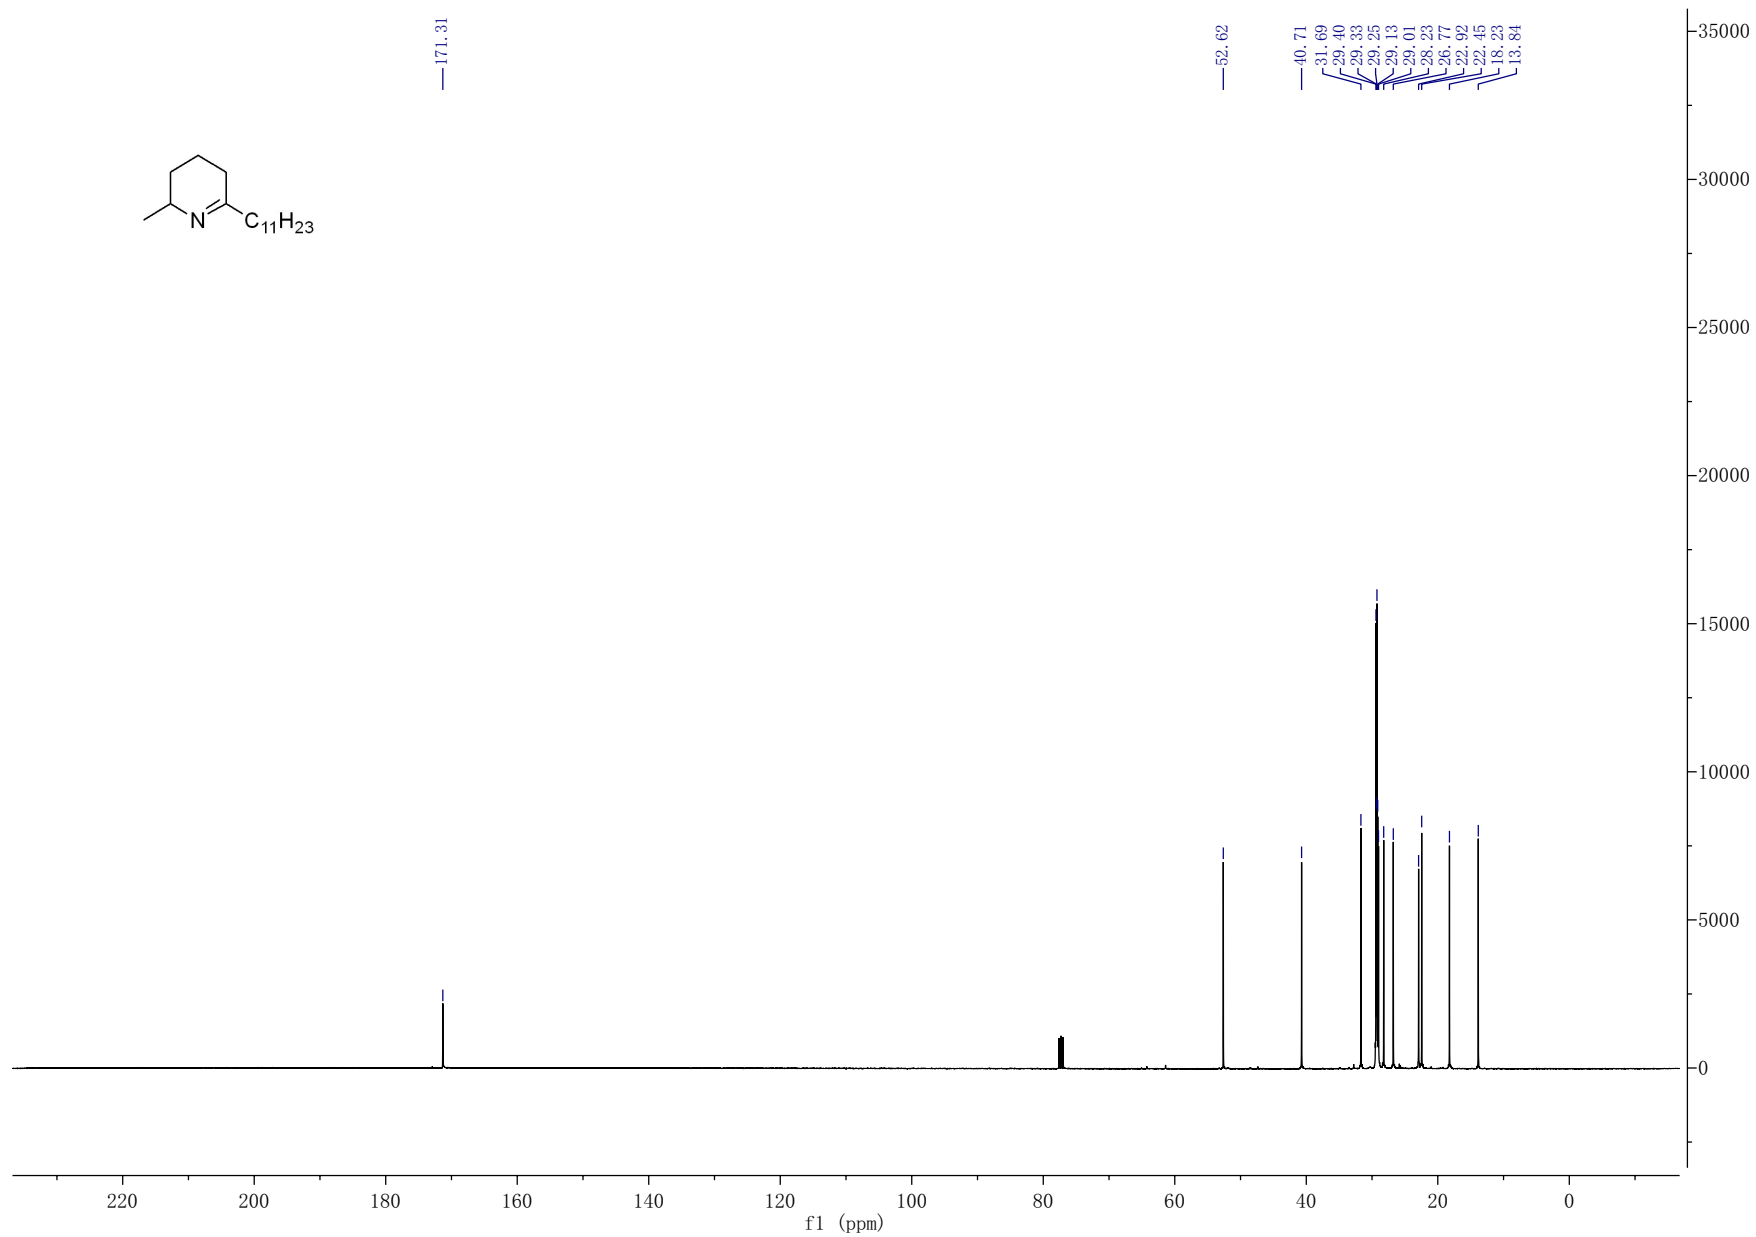

# S12. HRMS Spectrum of Compound 6a

## Mass Spectrum SmartFormula Report

### Analysis Info

Analysis Name D:\Data\2020.09.25 chen li\pos-1\_000001.d  
Method ESI\_101506  
Sample Name TUNMIX  
Comment

Acquisition Date 9/25/2020 5:32:03 PM

Operator  
Instrument apex-Ultra

### Acquisition Parameter

|                          |            |                         |           |                       |                          |
|--------------------------|------------|-------------------------|-----------|-----------------------|--------------------------|
| Polarity                 | Positive   | Source                  | ESI       | No. of Laser Shots    | 20                       |
| Averaged Scans           | 16         | No. of Cell Fills       | 1         | Laser Power           | 51.0 %                   |
| Broadband Low Mass       | 100.3 m/z  | End Plate               | 4000.0 V  | MALDI Plate           | 300.0 V                  |
| Broadband High Mass      | 2500.0 m/z | Capillary Entrance      | 4500.0 V  | Imaging Spot Diameter | 2000.0 µm                |
| Acquisition Mode         | Single MS  | Skimmer 1               | 30.0 V    |                       |                          |
| Pulse Program            | basic      | Drying Gas Temperature  | 180.0 °C  | Calibration Date      | Fri Sep 25 08:42:02 2020 |
| Source Accumulation      | 0.0 sec    | Drying Gas Flow Rate    | 4.0 L/min | Data Acquisition Size | 524288                   |
| Ion Accumulation Time    | 1.0 sec    | Nebulizer Gas Flow Rate | 1.0 L/min | Apodization           | Sine-Bell Multiplication |
| Flight Time to Acq. Cell | 0.0 sec    |                         |           |                       |                          |

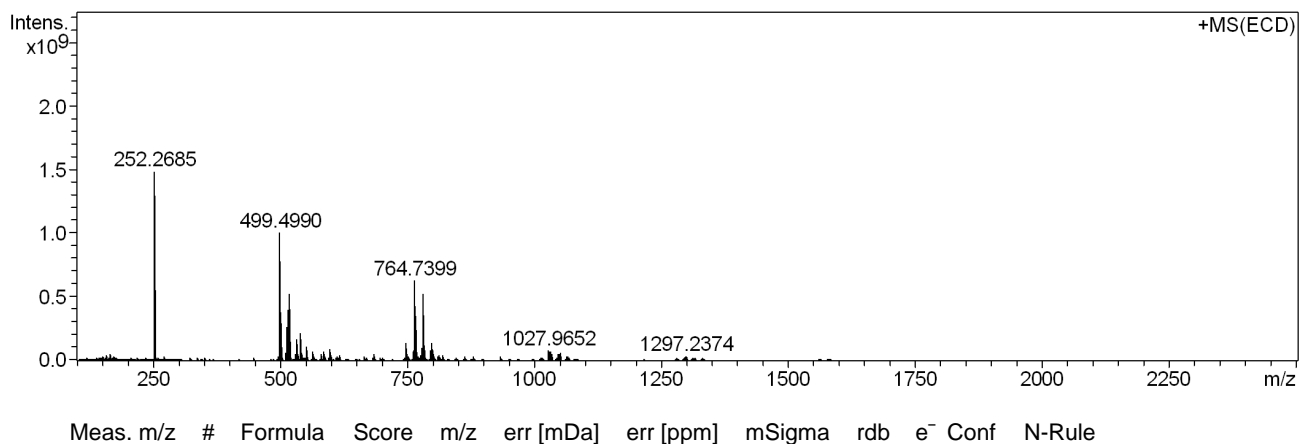

# S13. <sup>1</sup>H NMR Spectrum of Compound 6b

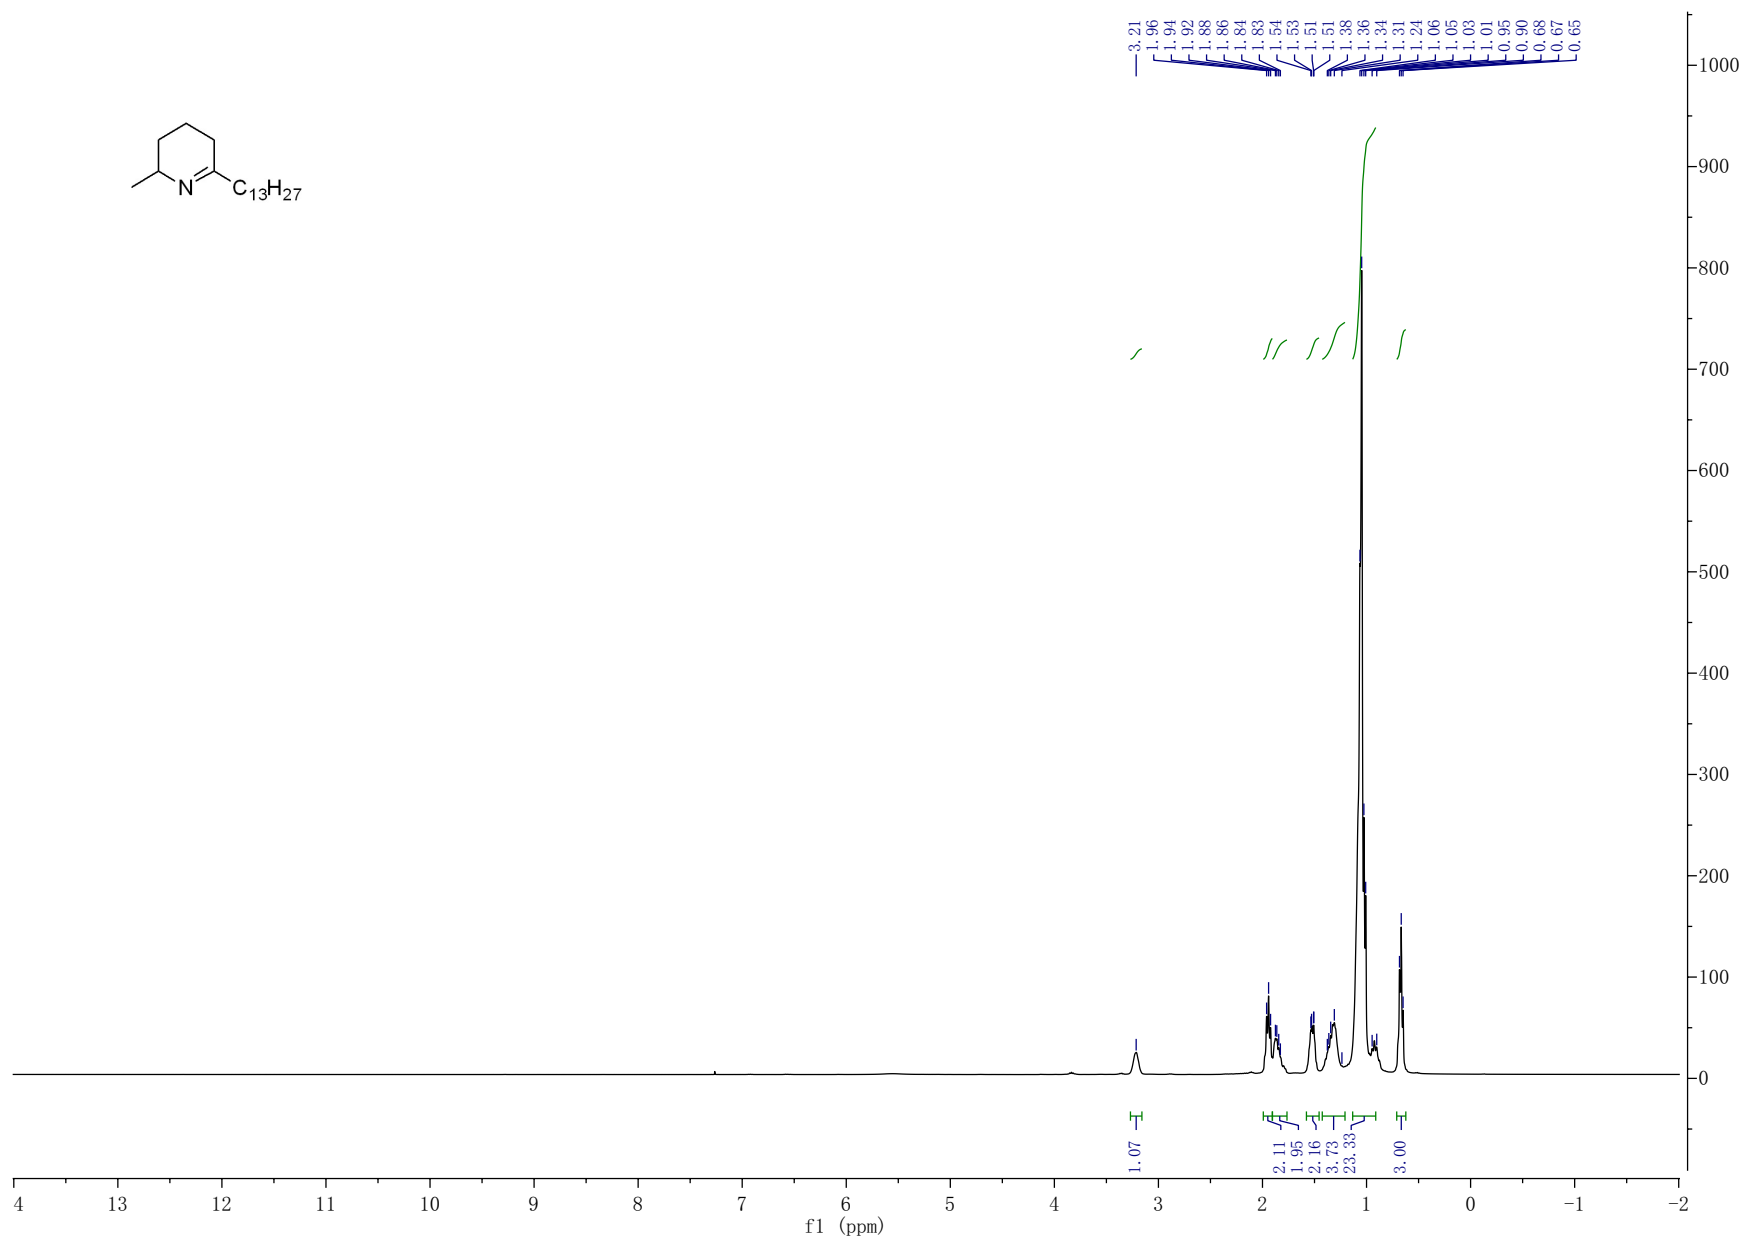

# S14. $^{13}\text{C}$ NMR Spectrum of Compound6b

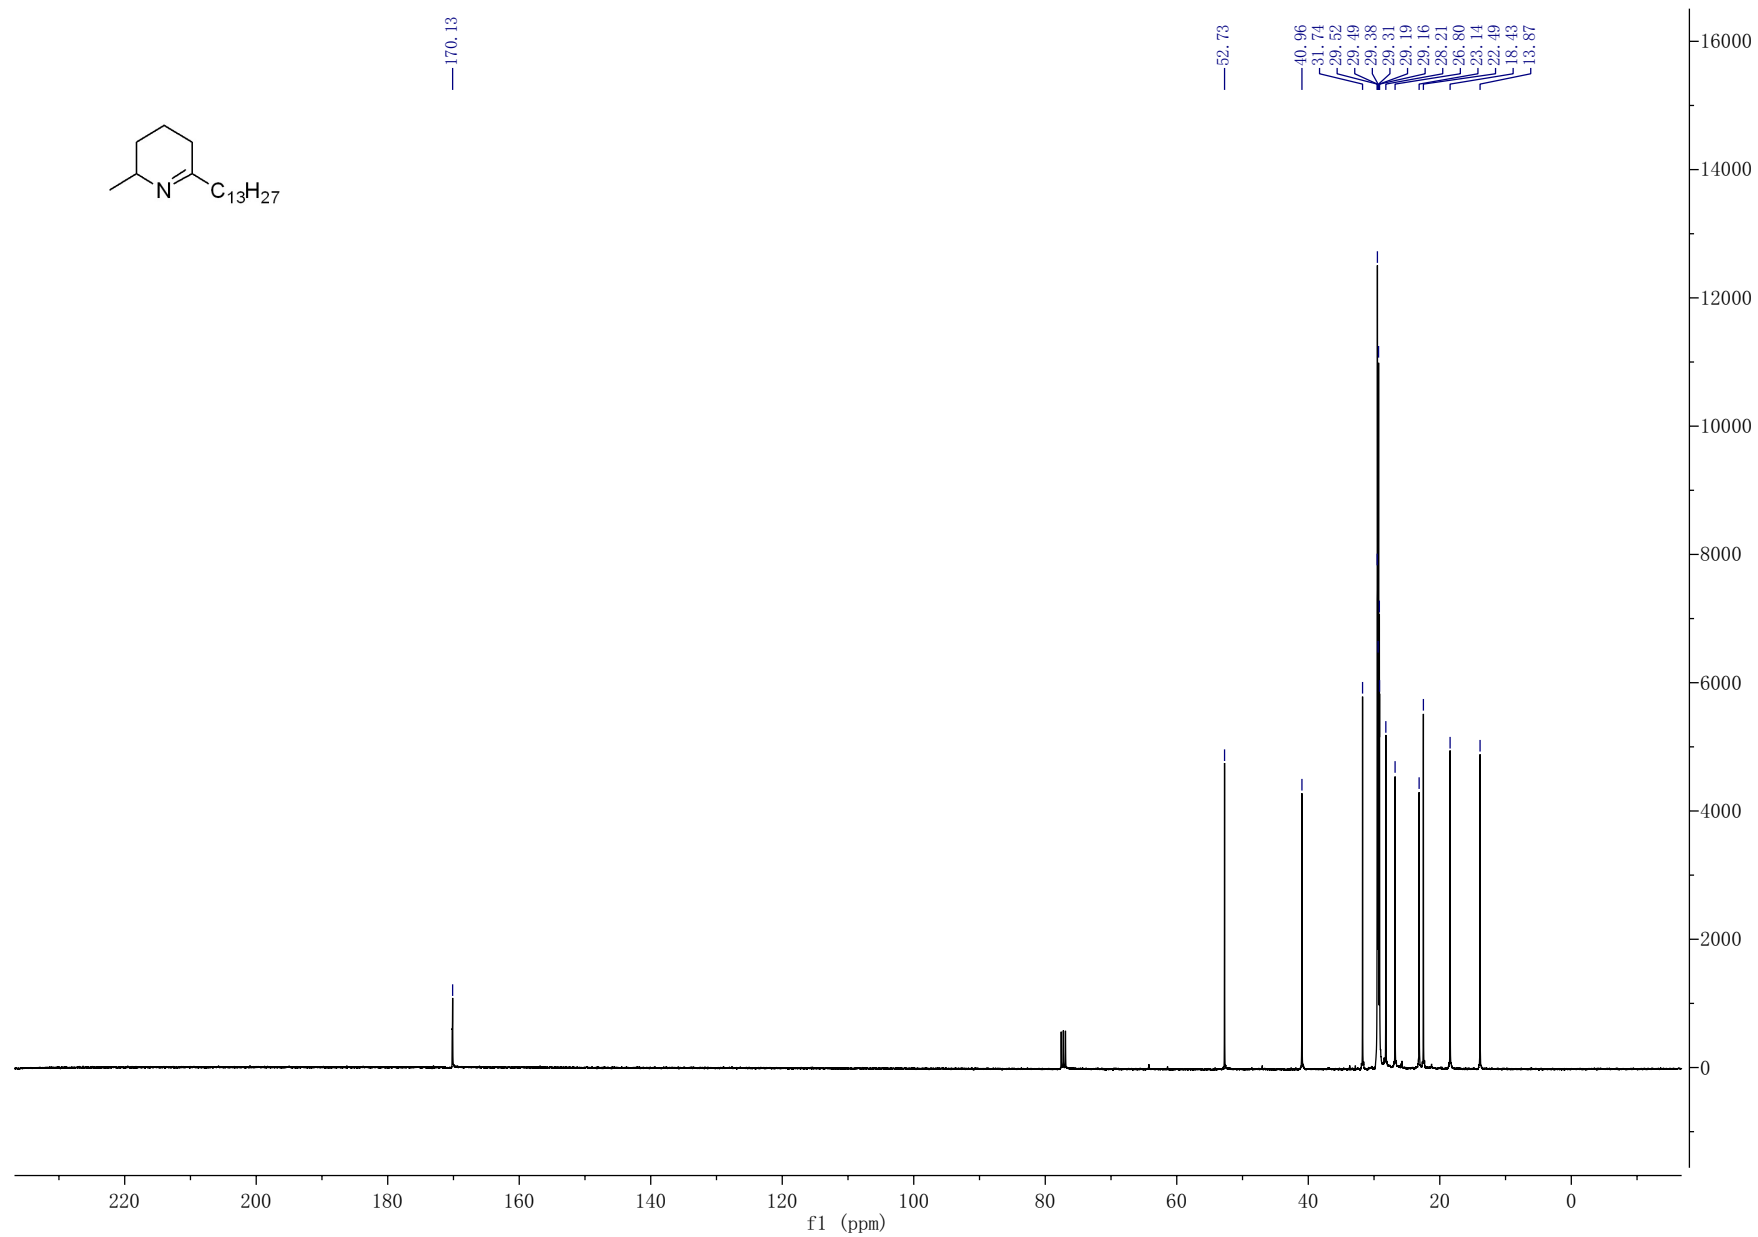

# S15. HRMS Spectrum of Compound 6b

## Mass Spectrum SmartFormula Report

### Analysis Info

Analysis Name D:\Data\2020.09.25 chen li\pos-2\_000001.d  
Method ESI\_101506  
Sample Name TUNMIX  
Comment

Acquisition Date 9/25/2020 5:47:23 PM

Operator  
Instrument apex-Ultra

### Acquisition Parameter

|                          |            |                         |           |                       |                          |
|--------------------------|------------|-------------------------|-----------|-----------------------|--------------------------|
| Polarity                 | Positive   | Source                  | ESI       | No. of Laser Shots    | 20                       |
| Averaged Scans           | 16         | No. of Cell Fills       | 1         | Laser Power           | 51.0 %                   |
| Broadband Low Mass       | 100.3 m/z  | End Plate               | 4000.0 V  | MALDI Plate           | 300.0 V                  |
| Broadband High Mass      | 2500.0 m/z | Capillary Entrance      | 4500.0 V  | Imaging Spot Diameter | 2000.0 µm                |
| Acquisition Mode         | Single MS  | Skimmer 1               | 30.0 V    |                       |                          |
| Pulse Program            | basic      | Drying Gas Temperature  | 180.0 °C  | Calibration Date      | Fri Sep 25 08:42:02 2020 |
| Source Accumulation      | 0.0 sec    | Drying Gas Flow Rate    | 4.0 L/min | Data Acquisition Size | 524288                   |
| Ion Accumulation Time    | 1.0 sec    | Nebulizer Gas Flow Rate | 1.0 L/min | Apodization           | Sine-Bell Multiplication |
| Flight Time to Acq. Cell | 0.0 sec    |                         |           |                       |                          |

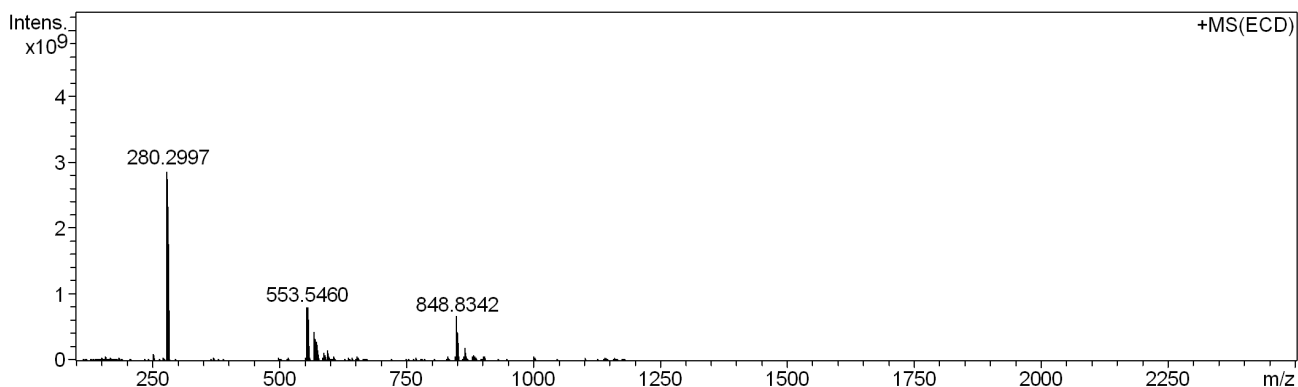

| Meas. m/z | # | Formula | Score | m/z | err [mDa] | err [ppm] | mSigma | rdb | e <sup>-</sup> | Conf | N-Rule |
|-----------|---|---------|-------|-----|-----------|-----------|--------|-----|----------------|------|--------|
|-----------|---|---------|-------|-----|-----------|-----------|--------|-----|----------------|------|--------|



# S16. $^1\text{H}$ NMR Spectrum of Compound 6c

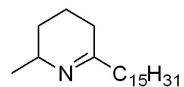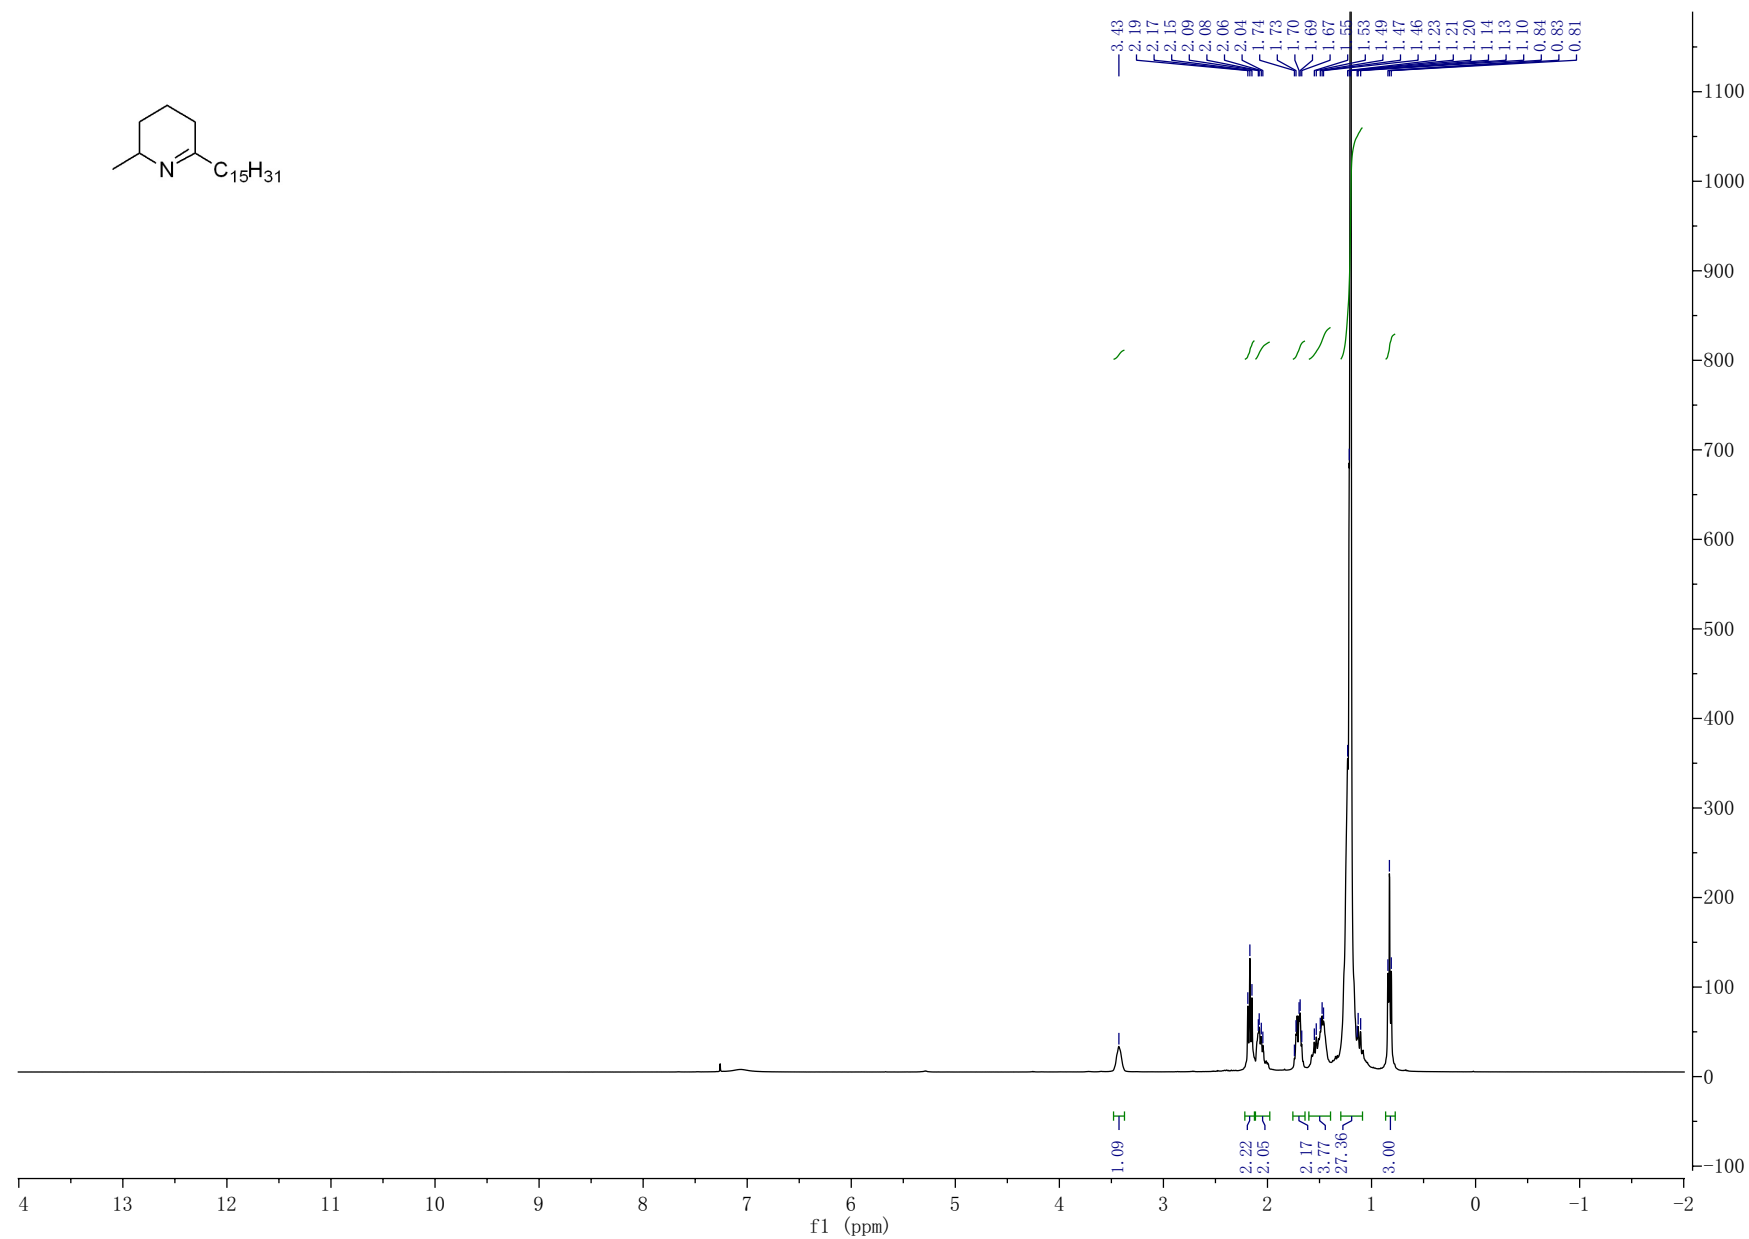

# S17. <sup>13</sup>C NMR Spectrum of Compound6c

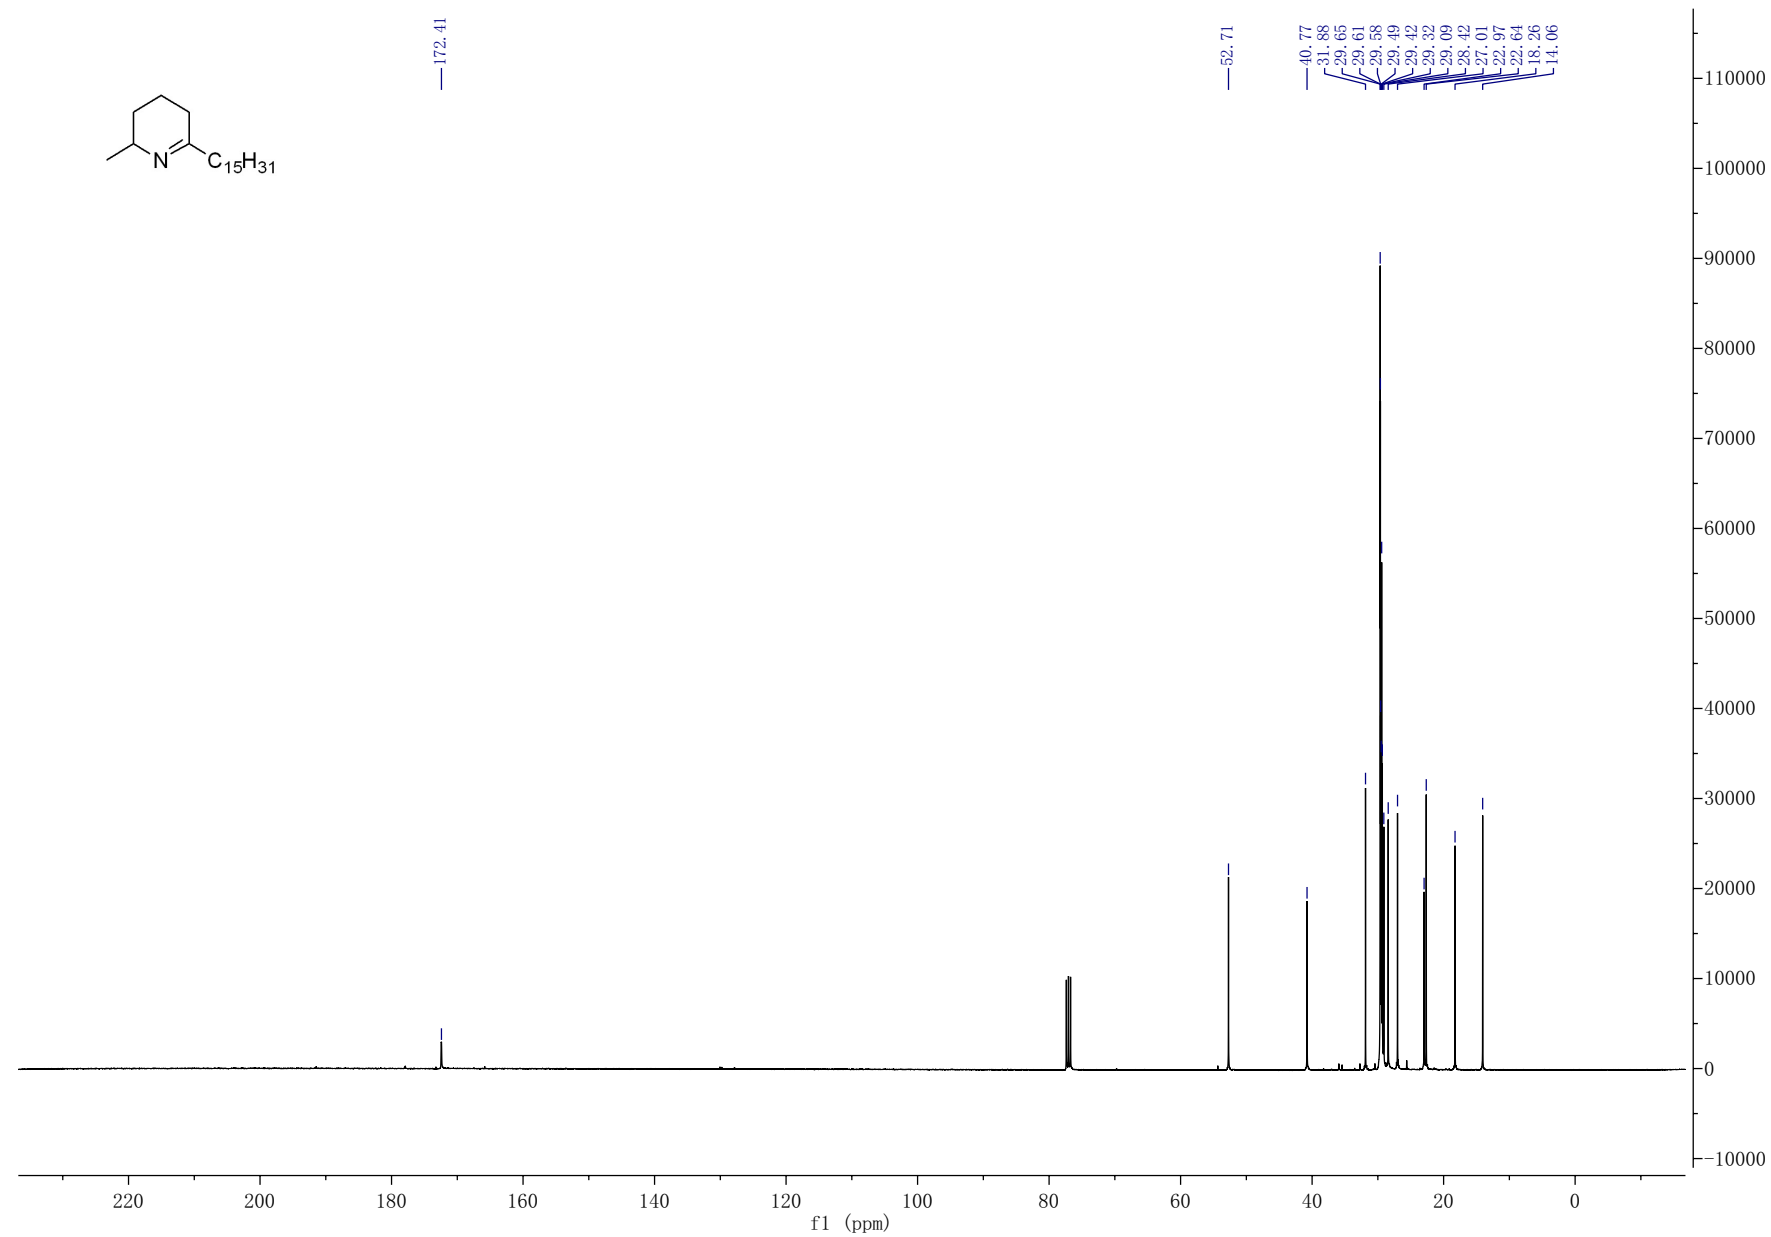

# S18. HRMS Spectrum of Compound 6c

## Mass Spectrum SmartFormula Report

### Analysis Info

Analysis Name D:\Data\2020.09.25 chen li\pos-3\_000001.d  
Method ESI\_101506  
Sample Name TUNMIX  
Comment

Acquisition Date 9/25/2020 5:51:47 PM

Operator  
Instrument apex-Ultra

### Acquisition Parameter

|                          |            |                         |           |                       |                          |
|--------------------------|------------|-------------------------|-----------|-----------------------|--------------------------|
| Polarity                 | Positive   | Source                  | ESI       | No. of Laser Shots    | 20                       |
| Averaged Scans           | 16         | No. of Cell Fills       | 1         | Laser Power           | 51.0 %                   |
| Broadband Low Mass       | 100.3 m/z  | End Plate               | 4000.0 V  | MALDI Plate           | 300.0 V                  |
| Broadband High Mass      | 2500.0 m/z | Capillary Entrance      | 4500.0 V  | Imaging Spot Diameter | 2000.0 µm                |
| Acquisition Mode         | Single MS  | Skimmer 1               | 30.0 V    |                       |                          |
| Pulse Program            | basic      | Drying Gas Temperature  | 180.0 °C  | Calibration Date      | Fri Sep 25 08:42:02 2020 |
| Source Accumulation      | 0.0 sec    | Drying Gas Flow Rate    | 4.0 L/min | Data Acquisition Size | 524288                   |
| Ion Accumulation Time    | 1.0 sec    | Nebulizer Gas Flow Rate | 1.0 L/min | Apodization           | Sine-Bell Multiplication |
| Flight Time to Acq. Cell | 0.0 sec    |                         |           |                       |                          |

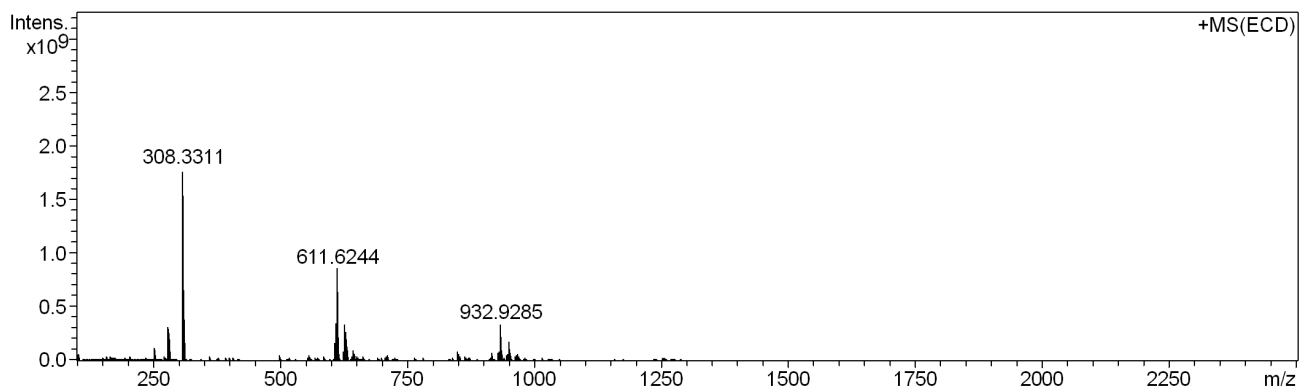

| Meas. m/z | # | Formula | Score | m/z | err [mDa] | err [ppm] | mSigma | rdb | e <sup>-</sup> | Conf | N-Rule |
|-----------|---|---------|-------|-----|-----------|-----------|--------|-----|----------------|------|--------|
|-----------|---|---------|-------|-----|-----------|-----------|--------|-----|----------------|------|--------|
